1                    **The orphan ligand, Activin C, signals through activin receptor-like kinase 7**  
2  
3

4    **Authors.**

5    Erich J. Goebel<sup>1</sup>, Luisina Ongaro<sup>2</sup>, Emily Kappes<sup>1</sup>, Elitza Belcheva<sup>3</sup>, Roselyne Castonguay<sup>3</sup>,  
6    Ravindra Kumar<sup>3</sup>, Daniel J Bernard<sup>2</sup>, Thomas B. Thompson<sup>1</sup>

- 7  
8    1. Department of Molecular Genetics, Biochemistry, and Microbiology, University of  
9    Cincinnati, Cincinnati, OH 45267, USA  
10    2. Department of Pharmacology and Therapeutics, Centre for Research in Reproduction and  
11    Development, McGill University, Montreal, Quebec, Canada  
12    3. Merck &Co., Inc., Kenilworth, NJ, USA  
13

14 **Abstract.**

15 Activin ligands are formed from two disulfide-linked inhibin  $\beta$  subunit chains. They exist as  
16 homodimeric proteins, as in the case of activin A (ActA; Inh $\beta$ A/Inh $\beta$ A) or activin C (ActC;  
17 Inh $\beta$ C/Inh $\beta$ C), or as heterodimers, as with activin AC (ActAC; Inh $\beta$ A:Inh $\beta$ C). While the biological  
18 functions of ActA and activin B (ActB) have been well-characterized, little is known about the  
19 biological function of ActC or ActAC. One thought is that the Inh $\beta$ C chain functions to interfere  
20 with ActA production by forming less active ActAC heterodimers. Here, we assessed and  
21 characterized the signaling capacity of ligands containing the Inh $\beta$ C chain. ActC and ActAC  
22 activated SMAD2/3-dependent signaling via the type I receptor, activin receptor-like kinase 7  
23 (ALK7). Relative to ActA and ActB, ActC exhibited lower affinity for the cognate activin type II  
24 receptors and was resistant to neutralization by the extracellular antagonist, follistatin. In mature  
25 adipocytes, which exhibit high ALK7 expression, ActC elicited a SMAD2/3 response similar to  
26 ActB, which can also signal via ALK7. Collectively, these results establish that ActC and ActAC  
27 are active ligands that exhibit a distinct signaling receptor and antagonist profile compared to  
28 other activins.

29

30 **Introduction.**

31 The activins are multifunctional secreted proteins that play critical roles in growth,  
32 differentiation, and homeostasis in a wide variety of cell types. As part of the greater TGF $\beta$   
33 family, the activins are dimeric in nature and built from two inhibin $\beta$  (Inh $\beta$ ) chains of  
34 approximately 120 amino acids (e.g., activin A, ActA, is built from two Inh $\beta$ A chains) that are  
35 tethered by a disulfide bond. Members of the activin class include ActA, activin B (ActB), activin  
36 C (ActC), and activin E (ActE), and extend to include GDF8 (myostatin) and GDF11. The Inh $\beta$   
37 chains share high sequence identity such that Inh $\beta$ A and Inh $\beta$ B are 63% identical, with Inh $\beta$ C  
38 ~50% identical to both Inh $\beta$ A and Inh $\beta$ B<sup>1</sup>. In addition to homodimer formation, several  
39 combinations of heterodimers have been observed, such as ActAB formed between Inh $\beta$ A and  
40 Inh $\beta$ B chains, as well as the heterodimer ActAC comprised of Inh $\beta$ A and Inh $\beta$ C chains<sup>2-5</sup>. While  
41 heterodimers have can form, most studies have focused on the homodimeric forms of the  
42 ligands. In addition, due to their established biological roles, many studies have focused on  
43 characterizing the ligands ActA and ActB; however, few studies have characterized the ligands  
44 ActC or ActE, especially regarding their ability to signal.

45 The Inh $\beta$ C subunit was first identified from a human liver cDNA library<sup>6</sup>. Its biological role  
46 was initially unknown due to the absence of hepatic phenotypes in *Inhbc* knockout mice<sup>7</sup>.  
47 Expression of Inh $\beta$ C is highest in the liver but has also been detected in reproductive tissues<sup>8</sup>.  
48 Inh $\beta$ C has been proposed to function as an ActA antagonist, as coexpression of Inh $\beta$ A and  
49 Inh $\beta$ C results in the formation of the heterodimer ActAC, which is a less active signaling  
50 molecule than ActA<sup>4,8</sup>. For example, ActAC is less potent than ActA in IH-1 myeloma cells<sup>9</sup>.  
51 Thus, inh $\beta$ C expression in the presence of Inh $\beta$ A not only reduces ActA levels, but also forms  
52 the less potent ligand ActAC. It has also been proposed that ActC directly antagonizes ActA  
53 signaling (ref). The mechanism for this is thought to be binding of a non-signaling ActC to the  
54 ActA receptors, acting as a competitive inhibitor. These two mechanisms are similar to how  
55 inhibin- $\alpha$  (Inh $\alpha$ ) forms heterodimers with Inh $\beta$ A chains to form inhibin A, reducing ActA  
56 production, and by competitively blocking ActA receptor binding<sup>10</sup>. The similarities were  
57 confirmed through studies which showed that in *Inha* knockout mice, which develop female  
58 reproductive tumors and have abnormally high levels of ActA resulting in cachexia, the ActA  
59 levels can be suppressed by over-expression of Inh $\beta$ C<sup>11,12</sup>. While almost all studies have  
60 suggested an inhibitory role of Inh $\beta$ C, a recent study showed that ActC relieved chronic  
61 neuropathic pain in mice and rats, functioning similarly to TGF $\beta$ 1, suggesting an agonistic role  
62 of the ActC ligand<sup>13,14</sup>.

63 TGF $\beta$  ligands are processed from precursor proteins comprised of a pro-domain, which  
64 aids in proper folding and ligand maturation, and a C-terminal signaling domain, which forms the  
65 covalent dimers (Fig. 1A). The latter assemble receptor complexes on the cell surface  
66 containing a symmetrical positioning of 2 type I and 2 type II serine-threonine kinase receptors,  
67 which results in the activation of a SMAD signaling cascade (Fig. 1B). There are seven type I  
68 receptors in the family termed activin receptor-like kinases 1 through 7 (ALK1-7)<sup>15</sup>. For ligands  
69 of the activin class, the type II receptors bind with high-affinity (nM) to each individual chain in  
70 the dimer, with the low-affinity type I receptors binding at a composite interface formed by the  
71 two dimer chains (Fig. 1A)<sup>16,17</sup>.

72 The activins, as a class, bind to and signal through three type I receptors: ALK4, ALK5  
73 and ALK7. In general, each member signals through ALK4, whereas GDF8 and GDF11 extend  
74 specificity to ALK5 and ActB to ALK7<sup>18,19</sup>. Structural and biochemical studies have made strides  
75 in illuminating the determinants of specificity between the activins and the type I receptors,  
76 providing context for the different biological roles of each activin member<sup>16,20-22</sup>. ALK4 and ALK5  
77 expression is relatively widespread, while ALK7 is primarily expressed in the adipose and  
78 reproductive tissues, and also in brain and pancreatic cells<sup>23,24</sup>. While ALK7 specific signaling  
79 has been linked to cancer cell apoptosis, its role in adipose tissue is more well-studied<sup>25,26</sup>. ActB  
80 signaling via ALK7 in adipose tissue suppresses lipolysis and downregulates adrenergic  
81 receptors, facilitating fat accumulation<sup>27-29</sup>. Similarly, loss of signaling in ALK7 knockout mice  
82 renders the animals resistant to diet-induced obesity<sup>27-29</sup>.

83 Unlike the other activin ligands, limited information is available for the signaling capacity  
84 of ActC and whether the homodimer can actually activate SMAD molecules. One hypothesis is  
85 that ActC is a non-signaling molecule and simply a non-functional by-product of expressing  
86 *Inh $\beta$ C* in the presence of *Inh $\beta$ A*. Given this uncertainty, we sought to characterize the signaling  
87 capacity of ActC across the panel TGF- $\beta$  type I receptors. We demonstrate that homodimeric  
88 ActC can act as a potent activator of SMAD2/3 and does so with high specificity via the type I  
89 receptor, ALK7. Additionally, unlike the rest of the activin class, ActC has a much lower affinity  
90 for the type II receptors, *ActRIIA* and *ActRIIB*. Intriguingly, ActC is not antagonized by follistatin,  
91 which potently neutralizes ActA, ActB, GDF8, and GDF11. Finally, we demonstrate that ActC  
92 can activate SMAD2/3 signaling similarly to ActB in mature adipocytes in an ALK7-dependent  
93 manner.

94

## 95 **Methods.**

### 96 **Protein expression and purification.**

#### 97 *ActRIIA* and *ActRIIB*

98 The extracellular domains of human *ActRIIA* (residues 1-134) and rat *ActRIIB* (residues 1-120)  
99 were produced as previously described<sup>16</sup>. Specifically, both receptors were subcloned into the  
100 pVL1392 baculovirus vector with C-terminal Flag and His<sub>10</sub> tags (*ActRIIA*) or a C-terminal His<sub>6</sub>  
101 tag followed by a thrombin cleavage site (*ActRIIB*). Recombinant baculoviruses were generated  
102 through the Bac-to-Bac system (*ActRIIA*; Invitrogen - Waltham, MA) or the Baculogold system  
103 (*ActRIIB*; Pharmingen - San Diego, CA). Virus amplification and protein expression were carried  
104 out using standard protocols in SF+ insect cells (Protein Sciences - Meriden, CT). *ActRIIA* and  
105 *ActRIIB* were purified from cell supernatants by using Ni Sepharose affinity resin (Cytiva –  
106 Marlborough, MA) with buffers containing 50mM Na<sub>2</sub>HPO<sub>4</sub>, 500mM NaCl, and 20mM imidazole,  
107 pH 7.5 for loading/washing and 500mM imidazole for elution. *ActRIIB* was digested with  
108 thrombin overnight to remove the His<sub>6</sub> tag. *ActRIIA* and *ActRIIB* were subjected to size  
109 exclusion chromatography (SEC) using a HiLoad Superdex S75 16/60 column (Cytiva) in 20mM  
110 Hepes, and 500mM NaCl, pH 7.5.

111

112 *ActRIIA-Fc*, *ActRIIB-Fc*, *ActRIIB-ALK7-Fc*, *ALK7-Fc* and *ActRIIB-ALK4-Fc*

113 ActRIIA-Fc was purchased from R&D (Cat. No. 340-RC2-100 – Minneapolis, MN). ActRIIB-Fc  
114 was expressed and purified from Chinese hamster ovary cells as previously described<sup>21,56</sup>.  
115 Briefly, ActRIIB-Fc was isolated using affinity chromatography with Mab Select Sure Protein A  
116 (GE healthcare – Waukesha, WI), followed by dialysis into 10mM Tris, 137mM NaCl, and  
117 2.7mM KCl, pH 7.2. ActRIIB-ALK7-Fc and ActRIIB-ALK4-Fc were designed and expressed as  
118 previously described in CHO DUKX cells through the coexpression of two plasmids, each  
119 containing a receptor ECD (ActRIIB or ALK4) fused to a modified human IgG1 Fc domain<sup>34,57</sup>.  
120 Purification was performed through protein A MabSelect SuRe chromatography (Cytiva), then  
121 eluted with glycine at low pH. The resulting sample was further purified over a Ni Sepharose 6  
122 fast flow column (Cytiva) followed by an imidazole elution gradient, an ActRIIB affinity column  
123 and ultimately, a Q Sepharose column (Cytiva). ALK7-Fc production was performed as  
124 described previously<sup>57</sup>.

#### 125 126 *Antibodies neutralizing ActRIIA, ActRIIB, ActRIIA/ActRIIB and ALK7*

127 An Anti-ActRIIA antibody was obtained through phage-display technology, while anti-ActRIIB,  
128 anti-ActRIIA/ActRIIB and ALK7 antibodies were generated using the Adimab platform. The first  
129 three antibodies were expressed from stable CHO pools, while anti-ALK7 was transiently  
130 expressed in ExpiCHO cells (Thermo Fisher). The CM was purified over Mab SelectSure  
131 Protein A (Cytiva) followed by ion-exchange chromatography.

#### 132 133 *ActA, ActB, and Inhibin A*

134 Mature, recombinant ActA and ActB were prepared as previously described<sup>16,19</sup>. Briefly, ActA  
135 (pAID4T) was expressed in Chinese hamster ovary (CHO) DUKX cells. Conditioned media (CM)  
136 of ActA was then mixed with a proprietary affinity resin made with an ActRIIA-related construct  
137 (Acceleron). The resin was then lowered to pH 3 to dissociate the propeptide-ligand complex.  
138 Following this, the pH was raised to 7.5 and the resin was incubated for 2h at room  
139 temperature. ActA was eluted with 0.1M glycine pH 3.0, which was concentrated over a phenyl  
140 hydrophobic interaction column (Cytiva) and eluted with 50% acetonitrile/water with 0.1%  
141 trifluoroacetic acid (TFA). Lastly, ActA was further purified by HPLC over a reverse phase C4  
142 column (Vydac) with a gradient of water/0.1% TFA and acetonitrile/0.1% TFA. Expression of  
143 ActB was performed through the use of a previously generated CHO-DG44 stable cell line<sup>19</sup>.  
144 CM was initially clarified over an ion exchange SP XL column (Cytiva) in 6M urea, 25mM MES,  
145 50mM Tris pH 6.5. The flow-through was then adjusted to 0.8M NaCl and applied to a Phenyl  
146 Sepharose column (Cytiva) and ActB was eluted by decreasing the NaCl through a gradient.  
147 Lastly, ActB was purified by reverse phase chromatography (C18, Cytiva) and eluted similarly to  
148 ActA. Recombinant human ActB used in the assays involving differentiated adipocytes was  
149 purchased from R&D (Cat. No. 659-AB-005). Inhibin A was produced and purified as previously  
150 described<sup>58</sup>.

#### 151 152 *ActAC and ActC*

153 Mature recombinant human ActAC and ActC were purchased from R&D (Cat. No. 4879-AC and  
154 1629-AC, respectively). Antibodies used include: ActA (AF338, R&D); ActC (MAB1639, R&D);  
155 Goat (PI-9500, Vector Laboratories) and Mouse (DC02I, Calbiochem). ActC wt (IQP) and ActC  
156 Gln267Ala (IAP) were expressed transiently in HEK293T cells using a construct with an  
157 optimized furin cleavage site. The conditioned media was then adjusted to 0.8M NaCl and  
158 applied to a Phenyl Sepharose column (Cytiva) followed by elution with low NaCl. Lastly, ActC  
159 was then purified using reverse phase chromatography (C18, Cytiva) and eluted similarly to  
160 ActA and ActB.

#### 161 162 *Fst288 and Fstl3*

163 Both Fst288 and Fstl3 were produced as previously described<sup>39</sup>. Fst288 was expressed from a  
164 stably transfected CHO cell line and purified from CM by binding to a heparin-sepharose column  
165 (abcam) in 100mM NaBic pH 8 and 1.5M NaCl, with a low salt gradient to elute followed by  
166 cation exchange over a Sepharose fast flow (Cytiva) in 25mM HEPES pH 6.5, 150mM NaCl  
167 with a high salt elution gradient. Finally, Fst288 was then purified over an HPLC SCX column in  
168 2.4 mM Tris, 1.5 mM Imidazole, 11.6 mM piperazine pH 6 with a high salt, high pH (10.5)  
169 gradient elution. Fstl3 was cloned into the pcDNA3.1/myc-His expression vector and expressed  
170 transiently in HEK293F cells. CM was harvested after 6 days and applied to His-affinity resin  
171 (Cytiva), followed by washing with a buffer of 500mM NaCl, 20mM Tris pH 8 and elution with  
172 500mM imidazole. Fstl3 was then subjected to SEC using a HiLoad Superdex S75 16/60  
173 column (Cytiva) in 20mM HEPES pH 7.5 and 500mM NaCl.

#### 174 175 **Luciferase reporter assays.**

176 Assays using the HEK-293-(CAGA)<sub>12</sub> or BRITER luciferase reporter cells were performed in a  
177 similar manner as described previously<sup>16,19,20,59</sup>. Specifically, cells were plated in a 96-well  
178 format (3 x 10<sup>4</sup> cells/well) and grown for 24h. For standard EC50 experiments (Fig. 1B and C),  
179 growth media was removed and replaced with serum free media supplemented with 0.1% BSA  
180 (SF<sup>BSA</sup> media, Thermo Fisher) and the desired ligand, where a two-fold serial dilution was  
181 performed with a starting concentration of 160nM (ActA and ActAC, (CAGA)<sub>12</sub>) or 4.96nM (ActC,  
182 (CAGA)<sub>12</sub> and ActA, ActAC, ActC, BRITER). Incubation was performed for 18 h, cells were then  
183 lysed and assayed for luminescence using a Synergy H1 Hybrid plate reader (BioTek –  
184 Winooski, VT). For the assays featuring transfections of ALK4<sub>st</sub>, ALK5<sub>st</sub> or ALK7<sub>st</sub>, a total of  
185 50ng DNA (10ng Type I receptor, 40ng empty vector) was transfected using Mirus LT-1  
186 transfection reagent at 24h post-plating. Each receptor construct contains a single point  
187 mutation (pRK5 rat ALK5 S278T (ST), pcDNA3 rat ALK4 S282T, pcDNA4B human ALK7  
188 S270T) conferring resistance to the inhibitory effects of the small molecule SB-431542. Media  
189 was then removed and replaced with SF<sup>BSA</sup> media with 10μM SB-431542 and the desired ligand  
190 for 18h. For the experiments featuring ActRIIA-Fc, ActRIIB-Fc, the neutralizing antibodies,  
191 Fst288 or Fstl3, these proteins were added to the ligands and incubated for 10min prior to  
192 addition to cells. The luminescence data was imported into Graphpad Prism for figure  
193 generation.

#### 194 195 **Surface plasmon resonance (SPR) studies.**

196 SPR experiments were carried out in HBS-EP+ buffer (10mM HEPES pH 7.4, 500mM NaCl, 3.4  
197 mM EDTA, 0.05% P-20 surfactant, 0.5mg/ml BSA) at 25C on a Biacore T200 optical biosensor  
198 system (Cytiva). Fc-fusion constructs of each receptor were captured using either a Series S  
199 Protein A sensor chip (GE Healthcare) or a Series S CM5 sensor chip (GE Healthcare) with  
200 goat anti-human Fc-specific IgG (Sigma-Aldrich – Saint Louis, MO) immobilized with a target  
201 capture level of ~70 RU. Experiments with ActRIIA-Fc (ActA, ActAC, ActB), ActRIIB-Fc (ActA,  
202 ActAC, ActB), and ActRIIB-ALK4-Fc (ActA, ActAC, ActC) were performed with the former chip  
203 while experiments coupling ActRIIA-Fc (ActC), ActRIIB-Fc (ActC) and ActRIIB-ALK7-Fc (ActA,  
204 ActAC, ActC, ActB) were performed with the latter chip methodology. An 8-step, two-fold serial  
205 dilution was performed in the aforementioned buffer for each ligand, with an initial concentration  
206 of 10nM (for Activin C, a 10-step, two-fold serial dilution beginning at 150 nM was performed, for  
207 Activin AC, a 9-step, two-fold serial dilution starting at 20nM was performed). Each cycle had a  
208 ligand association and dissociation time of 300 and 600 seconds, respectively. The flow rate for  
209 kinetics was maintained at 50uL/min. SPR chips were regenerated with 10mM Glycine pH 1.7.  
210 Kinetic analysis was conducted using the Biacore T200 evaluation software using a 1:1 fit model  
211 with mass transport limitations (red lines). Each binding experiment was performed in duplicate,  
212 fit individually and then averaged.

213

## 214 **Structural modeling and alignments.**

215 The model of ActC was built with Swiss-model using several ActA structures as templates: PDB  
216 codes 1S4Y (ActA:ActRIIB), 2ARV (unbound ActA), 2B0U (ActA:Fs288), 5HLZ (Pro-ActA) and  
217 7OLY (ActA:ActRIIB:ALK4)<sup>20,38,60–63</sup>. A consensus was observed in the overall structure,  
218 particularly at the type II interface and IAP motif. Ultimately, the model built from 7OLY was  
219 used for the comparison in Figure 5, as it is the most complete ActA-receptor complex, and all  
220 images and alignments were performed in PyMol (The PyMol Molecular Graphics  
221 System, Schrödinger, LLC, New York, NY).

222

## 223 **Adipocyte isolation, differentiation, and treatment for western blot.**

224 Adipocyte stem cells were isolated, cultured, and differentiated as previously described<sup>64</sup>.  
225 Briefly, inguinal adipose tissue was harvested aseptically from male mice (3-4 weeks old) and  
226 placed in sterile PBS, followed by mincing and collagenase digestion (1 mg/ml) for 1 h at 37°C.  
227 Then, the digestion was filtered through a 70-µm mesh and centrifuged to separate the stromal  
228 vascular fraction (SVF). Following aspiration, the SVF was resuspended in DMEM  
229 supplemented with 10% FBS and Pen-strep-amphotericin (Wisent Inc. cat. No: 450-115-EL –  
230 Saint-Jean-Baptiste, Canada) and plated in a 6-well format at ~320,000 cells/well. Following  
231 expansion over four days, cells were differentiated over the course of four days using a solution  
232 of 5µM dexamethasone, 0.5mM 3-isobutyl-1-methylxanthine, 10µg/ml insulin and 5µM  
233 Rosiglitazone. Adipocytes were then maintained for six additional days prior to experimentation  
234 in DMEM/FBS + insulin. 3T3-L1 cells were differentiated to adipocytes following ATCC  
235 recommended protocol. Briefly, 3T3-L1 cells were differentiated over the course of four days  
236 using a solution of 1 µM dexamethasone, 0.5 mM 3-isobutyl-1-methylxanthine and 1 µg/ml  
237 insulin. 3T3-L1 chemically-induced adipocytes were then maintained for six additional days prior  
238 to experimentation in DMEM/FBS + insulin. Differentiated adipocytes from SVF or 3T3-L1 cells  
239 were then starved in serum-free media for 1h, after which they were treated with serum-free  
240 media containing ActA, ActB or ActC (2nM) for 1h ± Fst288 (800 ng/ml). In another set of  
241 experiments, differentiated-SVF cells were treated with ActA, ActB or ActC (2nM) for 1h ± anti-  
242 ALK7 antibody (30 µg/ml). Concentrations were selected based on in vitro cell-based assays. At  
243 the end of the treatments, cells were lysed using RIPA buffer containing protease inhibitors and  
244 western analysis was performed using anti-pSmad2 (Cell Signaling, 138D4 – Danvers, MA) or  
245 anti-SMAD2/3 antibodies (Millipore, 07-408 – Burlington, MA).

246

## 247 **Adipocyte RNA extraction.**

248 Cells were collected in TRIzol and RNA was extracted following the manufacturer's protocol  
249 (Zymo Research). Total RNA from SVF or 3T3-L1 adipocyte-differentiated cells (at day 10 of  
250 differentiation) (200 ng) was reverse transcribed using (MMLV) reverse transcriptase following  
251 the manufacturer's protocol (Promega – Madison, WI). Expression of genes encoding the  
252 *Pparγ2*, *Cebpa*, and *Pnpla2* was analyzed in duplicate qPCR reactions using EvaGreen Master  
253 mix (ABMMmix-S-XL; Diamed) on a Corbett Rotorgene 6000 instrument (Corbett Life Science,  
254 Mortlake, NSW, Australia). Gene expression was determined relative to the housekeeping gene  
255 *Rpl19* using the 2-ΔΔCt method<sup>65</sup>. Primer sequences are listed in Table S2.

256

## 257 **Adipocyte images and Oil Red O staining**

258 Before and after day 10 of differentiation, adipocyte images were acquired with an Axiocam 506  
259 mono camera (Zeiss – White Plains, NY) using ZEN 2.3 pro (Zeiss) software. For Oil Red O  
260 (ORO) staining, cells were washed in PBS and fixed in 10% formalin buffered solution for 10  
261 min. After fixation, cells were washed in 60% isopropanol and stained in an ORO solution (2:3  
262 v/v H<sub>2</sub>O: isopropanol, containing 0.5% ORO, Sigma O0625) for 1 hour. After staining, cells were  
263 washed in PBS and dye from lipid droplets was extracted by adding pure isopropanol for 10 min  
264 in a rotor shaker. Dye per well was quantified by absorbance at 500 nm in EZ Read 2000

265 microplate reader (Biochrom - Holliston, MA). After washing with PBS, cells were digested  
266 using a 0.25% Trypsin solution in PBS-EDTA for 24 h at 37°C. DNA was quantified using a  
267 Nanodrop, and cell lipid content was normalized by the corresponding cell DNA content per  
268 well.

269

## 270 **Results.**

### 271 **Activin C induces SMAD2/3 phosphorylation through ALK7.**

272 Cell-based reporter assays have long been used to measure SMAD activation. To  
273 investigate ActC's ability to induce canonical SMAD2/3 signaling like other activins, we  
274 performed luciferase reporter assays in an activin-responsive HEK293T cell line stably  
275 transfected with (CAGA)<sub>12</sub>-luciferase plasmid<sup>19,20</sup>. Purified recombinant activin ligands (ActA,  
276 ActAC, ActC, and ActB) were titrated to generate EC50 curves. In this format, ActA stimulated a  
277 response at lower ligand concentration than either ActAC or ActB (Fig. 1C, left panel). In  
278 contrast, ActC did not induce reporter activity up to concentrations of 5 nM. Of note, ActAC  
279 showed about half of the activity of ActA, consistent with ActAC being less potent than ActA but  
280 more potent than ActC. Neither ActAC nor ActC activated a SMAD1/5/8-dependent reporter in  
281 an osteoblast cell line, in contrast to the robust response observed with BMP2 (Fig. 1C, right  
282 panel).

283 Though the above data show that ActC does not signal like other activin ligands,  
284 HEK293 cells endogenously express only two of the three SMAD2/3 type I receptors, ALK4 and  
285 ALK5, with little to no expression of ALK7<sup>19,30</sup>. To address this limitation, we applied a  
286 heterologous system developed to interrogate specific signaling from individual type I  
287 receptors<sup>16</sup>. Here, a point mutation was introduced into each type I receptor [ALK4 S282T  
288 (ALK4<sub>st</sub>), ALK5 S278T (ALK5<sub>st</sub>), or ALK7 S270T (ALK7<sub>st</sub>)] that rendered it resistant to the small  
289 molecule kinase inhibitor, SB-431542, while maintaining ligand-induced activation. HEK293T  
290 (CAGA)<sub>12</sub>-luciferase reporter cells were transiently transfected with the modified receptors, then  
291 co-treated with the indicated ligands and SB-431542 to suppress signaling from endogenous  
292 receptors. In the presence of ALK4<sub>st</sub>, ActA, ActAC, and ActB, but not ActC, stimulated reporter  
293 activity (Fig. 1D). In ALK5<sub>st</sub>-transfected cells, none of the activins stimulated reporter activity,  
294 while GDF11, a known ALK5 ligand, served as a positive control (Fig. 1D). As expected, ActB  
295 and to a much lesser extent, ActA, induced reporter activation when ALK7<sub>st</sub> was transfected into  
296 the HEK293T (CAGA)<sub>12</sub>-luciferase reporter cells. Strikingly and unexpectedly, ActAC and ActC  
297 activated (CAGA)<sub>12</sub>-luc activity in the presence of ALK7<sub>st</sub> to a similar extent as ActB (Fig. 1D).

298 These data suggested that ActC can signal specifically through ALK7. To further validate  
299 these results, we utilized an antibody that was developed to specifically bind and neutralize  
300 ligand signaling through ALK7. Following treatment with the anti-ALK7 antibody, ActB signaling  
301 via ALK7<sub>st</sub> was significantly reduced while ActC signaling was nearly abrogated completely  
302 (Fig. 1E). The specificity of the antibody for ALK7 was confirmed as ActA signaling via ALK4<sub>st</sub>  
303 was unaffected (Fig. 1E). Taken together, these data show that the activin ligands have  
304 differential type I specificities. ActA signals predominantly through ALK4, ActB and ActAC signal  
305 through ALK4 and ALK7, while ActC signals exclusively through ALK7.

306

### 307 **Activin C and Activin AC interact with and require activin type II receptors to signal.**

308 In addition to the type I receptors, TGFβ family ligands must bind type II receptors to  
309 generate intracellular signals. Ligands of the activin class generally bind the type II receptors  
310 ActRIIA and ActRIIB with high affinity (pM-nM)<sup>16,21,31-33</sup>. Previous studies showed that ActAC  
311 binds ActRIIB with lower affinity than ActA, suggesting that the InhβC chain has a diminished  
312 type II interaction<sup>11</sup>. Given the new finding that ActC is a signaling molecule, we sought to  
313 determine and compare the binding affinities of ActA, ActAC, and ActC to ActRIIA and ActRIIB  
314 using Surface Plasmon Resonance (SPR). In this experiment, type II receptor extracellular  
315 domains (ECDs) fused to an antibody Fc fragment were captured using a Protein A biosensor

316 chip, while ActA, ActAC, or ActC were titrated as the analyte. For both ActRIIA-Fc and ActRIIB-  
317 Fc, binding affinity was highest for ActA (equilibrium constant (apparent  $K_D$ ) of 22 pM and 8.1  
318 pM, respectively) (Fig. 2, top row). ActAC also bound ActRIIA and ActRIIB with high affinity,  
319 although slightly weaker than ActA (150 pM and 90 pM, respectively), suggesting that the Inh $\beta$ C  
320 chain diminishes the overall type II affinity of the dimer (Fig. 2, middle row). ActC binding to  
321 ActRIIA and ActRIIB was much weaker, with a significantly faster dissociation rate than either  
322 ActA or ActAC (Fig. 2, bottom row). While ActA had no apparent preference for one type II  
323 receptor, consistent with previous studies, ActC had a higher affinity for ActRIIA than ActRIIB  
324 (Fig. S1A)<sup>16</sup>. Similarly, ActB binding to type II receptors was much stronger than ActC (Fig.  
325 S1B), indicating that ActC deviates from other activin class ligands by exhibiting low affinity for  
326 type II receptors. To confirm the weak binding of ActC towards type II receptors, we performed a  
327 native gel analysis where ActA, ActAC, and ActC were incubated with either ActRIIA or ActRIIB.  
328 Both ActA and ActAC, but not ActC, formed a stable complex when incubated with either  
329 ActRIIA and ActRIIB (Fig. S2). Collectively, these data indicate that ActC deviates from other  
330 activin class ligands by exhibiting low affinity for type II receptors.

331 We also used SPR to determine if ActC or ActAC bind specifically to ALK7. No to little  
332 binding of any of the activins, including ActC and ActAC, was observed for ALK7-Fc, indicating  
333 that for all ligands ALK7 is a low affinity receptor (Fig. S1C). With a low affinity type II and type I  
334 receptor, we asked whether the combination of receptors enhanced binding of ActC. A  
335 heterodimeric-Fc receptor fusion that incorporates both the type I and type II receptor can mimic  
336 natural signaling pairs<sup>34</sup>. Previously, ActRIIB-ALK4-Fc exhibited higher affinity for ActA than the  
337 monovalent ActRIIB-Fc, indicating enhanced binding due to incorporation of the type I  
338 receptor<sup>20</sup>. We therefore tested binding of the heterodimeric ActRIIB-ALK7-Fc to ActA, ActAC,  
339 and ActC (Fig. 2). ActA bound ActRIIB-ALK7-Fc (296 pM) with 7-fold lower affinity than ActRIIB-  
340 Fc (42 pM), indicating ALK7 did not contribute to binding, consistent with ActA not signaling via  
341 ALK7. Interestingly, significant binding was observed for both ActC (2 nM) and ActAC (51 pM) to  
342 ActRIIB-ALK7. While for ActAC, binding to ActRIIB-ALK7-Fc was slightly higher than binding to  
343 ActRIIB-Fc (64 pM), a dramatic difference was observed for ActC where binding was increased  
344 40-fold over ActRIIB-Fc alone. Similar studies were performed with ActRIIB-ALK4-Fc. As  
345 expected ActA bound with high-affinity to ActRIIB-ALK4-Fc while ActAC had a much weaker  
346 interaction (457 pM), and ActC failed to bind (Fig. 2). SPR experiments with ActB showed  
347 consistent results, where high-affinity interactions were observed with ActRIIA, ActRIIB, and  
348 ActRIIB-ALK7-Fc, with little to no binding to ALK7-Fc (Fig. S1C). Binding data for each SPR  
349 experiment can be found in Table S1.

350 Next, we investigated whether ActC signaling could be inhibited using the type II  
351 receptor-Fc constructs as a competitive antagonist (ligand trap) to block endogenous receptor  
352 binding in a cell-based assay (Fig. 3A). We employed the same assay system in which SB-  
353 431542 resistant type I receptors were transfected into HEK293T (CAGA)<sub>12</sub>-luc reporter cells.  
354 We titrated either ActRIIA-Fc or ActRIIB-Fc against a constant concentration (0.62 nM) of ActA,  
355 ActAC, ActC, or ActB (Fig. 3B and C). ActRIIA-Fc and ActRIIB-Fc dose-dependently inhibited  
356 ActA and ActAC signaling via ALK4<sub>st</sub> and ablated ActB signaling via ALK7<sub>st</sub>. In contrast,  
357 signaling by both ActAC and ActC through ALK7<sub>st</sub> was not inhibited by ActRIIA-Fc or ActRIIB-Fc,  
358 even at the highest concentration of the decoy receptors (25 nM).

359 Given its low affinity for activin type II receptors, we wanted to determine whether ActC  
360 signaling through ALK7 was dependent on ActRIIA or ActRIIB. We therefore used a series of  
361 receptor neutralizing antibodies, which bind to either the ECD of ActRIIA or ActRIIB, or to both  
362 receptors (Fig. 3D). As expected, neutralization of either ActRIIA or ActRIIB significantly  
363 reduced signaling by ActA and ActB in the untransfected and untreated (i.e., without SB-  
364 431542) CAGA-luc cells (Fig. 3E). An antibody that simultaneously blocks both ActRIIA and  
365 ActRIIB more potently inhibited signaling of each activin ligand than the single-target antibodies,  
366 indicating that ActRIIA and ActRIIB were redundant. ActAC signaling in the



367 untransfected/untreated CAGA-luc cells was also inhibited by type II receptor neutralization in a  
368 similar manner to ActA and ActB. Again, ActC did not signal under these assay conditions  
369 unless ALK7<sub>st</sub> was added. Here, both ActAC and ActB signaling was readily inhibited by type II  
370 receptor blockade (Fig. 3F). ActC signaling was significantly reduced when ActRIIA was blocked  
371 and to a lesser extent with blocking ActRIIB. These observations demonstrate that, despite their  
372 lower affinities, ActC and ActAC require a type II receptor, with a preference for ActRIIA, for  
373 signaling via ALK7.

### 374 375 **Activin C is antagonized by inhibin A, but not follistatin-288 or follistatin-like protein 3.**

376 Activin class ligands are regulated through several mechanisms. One such mechanism  
377 is through extracellular antagonists, such as follistatin-288 (Fst-288) and follistatin-like 3  
378 (FSTL3), which bind and sequester ligands. Fst-288 and FSTL3 form a donut-like shape to  
379 surround activin ligands, occluding epitopes that are important for binding to both type I and  
380 type II receptors<sup>35–39</sup>. Given the new finding that ActC can signal via type I (ALK7) and II  
381 (ActRIIA/B) receptors, we next examined whether its actions were inhibited by either Fst-288 or  
382 FSTL3. Fst288, at two concentrations, robustly inhibited ActA and ActB induction of CAGA-luc  
383 activity via ALK4<sub>st</sub> (Fig. 4A). Fst288 also inhibited ActB signaling via ALK7<sub>st</sub>, though to a lesser  
384 extent. Fst288 moderately inhibited ActAC signaling via ALK4<sub>st</sub> and ALK7<sub>st</sub>, but unexpectedly  
385 had no impact on ActC actions (Fig. 4A). Similar results were observed with the related  
386 antagonist FSTL3, which binds and occludes activin ligands similarly to Fst288 (Fig. 4B)<sup>39,40</sup>.  
387 This unique resistance to classical activin antagonists further distinguishes ActC from the rest of  
388 the activin class.

389 Inhibins are ligand-like antagonists of activins that are formed from the  
390 heterodimerization of an Inh $\beta$ A or Inh $\beta$ B chain and the Inh $\alpha$  chain, resulting in the heterodimers  
391 inhibin A and B<sup>41</sup>. These heterodimers acts as a signaling dead molecules by binding type II  
392 receptors in a nonproductive receptor complex. To test whether inhibin A can antagonize ActC  
393 signaling, we titrated recombinant inhibin A against ActC in the above-described ALK7<sub>st</sub>  
394 luciferase assay. Like ActA, ActC signaling was dose-dependently attenuated by InhA with an  
395 IC50 value of 0.08 nM (SD +/- .04 nM) as compared to 0.2 nM for ActA (SD +/- .2 nM) (Fig. 4C).

### 396 397 **Modeling of the Activin C ligand.**

398 Given the low affinity of ActC for the activin type II receptors and the ligand's resistance  
399 to follistatin inhibition, we next examined what molecular differences within the activin class  
400 ligands could account for variation in ligand-receptor or ligand-follistatin interactions. A trio of  
401 residues (Ile340, Ala341, and Pro342; IAP motif; ActA) at the ligand knuckle are utilized during  
402 both type II receptor and follistatin binding<sup>33,38,39,42</sup>. Sequence alignment across the activin class  
403 reveals conservation of this motif in each ligand of the activin family, except for ActC and ActE  
404 (Fig. 5A). During complex formation between ActA:ActRIIB, the IAP motif forms the core of  
405 interactions with a series of hydrophobic residues in ActRIIB (Tyr60, Trp78, Phe101) (Fig. 5B  
406 and C). Additionally, this interface is engaged by Fst288, highlighting that the IAP motif is  
407 utilized by both antagonists and receptors (Fig. 5D). The core interactions involving the IAP  
408 motif are consistent across other structures within the activin class, such as GDF8:Fst288,  
409 GDF11:ActRIIB, and GDF11:Fst288<sup>16,19</sup>. In comparison, ActC contains a glutamine residue in  
410 place of the central alanine residue of the IAP motif. Generating a model of ActC (swissmodel to  
411 ActA; PDB: 7OLY) and aligning it to ActA reveals that Gln267 of ActC would be sterically  
412 unfavorable for interactions with both ActRIIB and Fst288 (Fig. 5C and D). Thus, we  
413 hypothesized that Gln267 in ActC might contribute to the reduced interaction with both the type  
414 II receptors and Fst288.

415 To test this idea, we expressed and purified both recombinant wildtype (IQP) and Q267A  
416 (IAP) ActC from HEK293T cells. The IAP mutant had similar activity to the IQP wildtype form of  
417 ActC in the ALK7<sub>st</sub>-dependent CAGA-luc assay (Fig. 5E). As determined by SPR, ActC wildtype

418 had low affinity for both ActRIIA-Fc and ActRIIB-Fc (Fig. 5F), consistent with binding data using  
419 recombinant ActC from R&D Systems. Replacement of the glutamine with alanine in ActC  
420 resulted in an increase in type II receptor binding, especially for ActRIIA-Fc (Fig. 5F). Next, we  
421 challenged ActC<sup>Q267A</sup> with follistatin in the CAGA-luc assay. Here, ActC<sup>Q267A</sup> was more inhibited  
422 by both Fst288 and Fstl3 than wildtype ActC (Fig. 5G). Taken together, these data support the  
423 hypothesis that the glutamine substitution in ActC relative to the other ligands of the activin  
424 class (ActA, ActB, GDF8 and GDF11) weakens the affinity for both the type II receptors and  
425 follistatin.

426

#### 427 **Activin C signals similarly to activin B in mature adipocytes.**

428 Since we have shown that ActC can activate ALK7 in a cell-based luciferase assay, we  
429 next sought to determine the ligand's capacity to signal via endogenous ALK7 in a biologically  
430 relevant cell type, adipocytes. To this end, we utilized both the preadipocyte cell line, 3T3-L1,  
431 and mature adipocytes derived from the stromal vascular fraction (SVF) of murine adipose  
432 tissue. Cells were differentiated over 4 days and maintained for 6 further days, where cell  
433 morphology and lipid droplets visibly increased, indicative of mature adipocytes (Fig. 6A). ActC  
434 stimulated SMAD2 phosphorylation (pSMAD2) in adipocytes differentiated from SVF but not  
435 3T3-L1 cells (Fig. 6B and 6C). Notably, ALK7 (product of the *Acvr1c* gene) expression was  
436 significantly higher in SVF- relative to 3T3-L1-derived adipocytes (Fig. 6D). ActB stimulated  
437 pSMAD2 in both cell types, presumably via ALK4 in 3T3-L1 or a combination of ALK4 and ALK7  
438 in differentiated adipocytes (Fig. 6B and 6C). In the mature (SVF-derived) adipocytes, both ActB  
439 and ActC induced pSMAD2 in a similar manner; however, Fst288 only blocked ActB action (Fig.  
440 6C), consistent with the results above in the ALK7<sub>st</sub>-dependent luciferase assay (Fig. 4A). The  
441 neutralizing ALK7 antibody blocked ActC-induced pSMAD2 in mature adipocytes supporting  
442 that signaling was dependent on the ALK7 receptor (Fig. 6E). Interestingly, ActB induced  
443 pSMAD2 was only partly blocked in this assay, likely due to residual signaling via ALK4 (Fig.  
444 6E). These results demonstrate that ActC is an ALK7-dependent signaling ligand and is  
445 follistatin resistant in a physiologically relevant context (Fig. 6C and E).

446 ActB has dual effects on adipogenesis, and its function depends on the relative  
447 expression of ALK4 and ALK7 during the process of adipocyte commitment and  
448 differentiation<sup>24,29,43,44</sup>. ActA or ActB exposure during differentiation of SVF cells, when ALK7  
449 levels are low, inhibits adipogenesis (Fig. 6F). Treatment with ActC at this early stage did not  
450 affect adipogenesis (Fig. 6F). Follistatin antagonized the anti-adipogenic effects of both ActA  
451 and ActB, restoring normal adipogenesis and lipid droplet formation (Fig. 6F). Furthermore,  
452 gene expression of both *Pparg2* and *Cebpa*, essential transcription factors for adipogenesis,  
453 was impaired by ActA or ActB, but not ActC (Fig. 6G). However, ActC significantly reduced both  
454 *Pnpla2* expression and lipid content, consistent with the late-stage, proadipogenic effects of  
455 ActB-ALK7 signaling (Fig. 6G)<sup>43,45-47</sup>.

456

#### 457 **Discussion.**

458 The binding/signaling profiles of some members of the activin class (ActA, ActB, GDF8,  
459 and GDF11) of TGFβ ligands have been largely characterized, where each member exhibits  
460 differential specificity for both the type II receptors, ActRIIA and ActRIIB, and the type I  
461 receptors: ALK4, ALK5, and ALK7. ActA is limited to a single type I receptor, ALK4, and has  
462 little type II receptor preference, while GDF11 can promiscuously signal through ALK4, ALK5,  
463 and ALK7 and seemingly favors interaction with ActRIIB<sup>16</sup>. The receptors for ActC have  
464 remained largely unknown in part due to the initial characterization of ActC as a non-signaling  
465 molecule<sup>5</sup>. In this study, we identified ActC as a bona fide signaling ligand with distinct  
466 molecular properties from other activin class ligands.

467 ActC signals through ALK7, whereas ActAC uses both ALK4 and ALK7. Thus, ligands  
468 that contain an InhβC subunit can bind and act through ALK7. This is similar to what was

469 previously described for ligands containing an  $\text{Inh}\beta\text{B}$  subunit, like activin B and activin AB. In  
470 contrast, ActA does not signal through ALK7. Interestingly, the heterodimer ActAC was more  
471 potent than ActC, which has similarly been reported for other heterodimers in the family, such  
472 as BMP2/4 and BMP2/7<sup>48,49</sup>. This might be a results of different type I receptor binding epitopes  
473 that are formed in the heterodimer versus the homodimer.

474 The molecular basis for type I receptor specificity remains an intriguing aspect of the  
475 evolution of the activin class ligands. Initial studies implicated the wrist region, including the  
476 prehelix loop as a major contributor towards type I receptor specificity, as swapping this region  
477 could alter type I receptor specificity<sup>35</sup>. More recent studies have identified residues in the  
478 fingertip region of the ligand as also have a major role in type I receptor specificity<sup>16,50</sup>. Given  
479 the low affinity nature of the type I receptors for ligands across the activin family, the current  
480 thought is that subtle differences at the type I:ligand interface dictate receptor specificity.  
481 Interestingly, fingertip residues that are important for ActA and GDF11 binding to type I  
482 receptors are divergent in ActC (Fig. S4) and could account for the latter's lack of signaling  
483 through ALK4. Most notably, a recent crystal structure of ActA in complex with ALK4 shows that  
484 D406 of ActA forms a hydrogen bond with the mainchain of ALK4. The corresponding residue is  
485 an arginine in ActC<sup>20</sup>. On the receptor side, the  $\beta 4$ - $\beta 5$  loop is important for ligand recognition  
486 and is shorter in ALK7 than ALK4 and ALK5, possibly to accommodate the larger arginine  
487 residue, which will extend towards this loop. Certainly, structures of ALK7 in complex with ActC  
488 or other ligands will help determine how specificity for ALK7 is acquired. Regardless, it seems  
489 that differences in the ligand fingertip and/or prehelix loop, coupled with differences in the  
490 receptor  $\beta 4$ - $\beta 5$  loop, dictate type I receptor specificity in the activin class.

491 In general, activin class ligands bind activin type II receptors with high affinity<sup>16,20,33,42</sup>.  
492 Conversely, ActC exhibits weak binding to both ActRIIA and ActRIIB. ActAC binds the type II  
493 receptors, but with reduced affinity compared to ActA. Thus, the  $\text{Inh}\beta\text{C}$  subunit appears to  
494 reduce affinity for the activin type II receptors. Nevertheless, the type II receptors are required  
495 for ActC signaling, as the ligand's activity was abrogated by activin type II receptor neutralizing  
496 antibodies and inhibin A. Unlike the other members of the activin class, ActC binds both type I  
497 and type II receptors with low affinity but is still able to signal. One possible explanation is that  
498 ActC binds to the type I and type II receptors cooperatively. This is supported by SPR studies  
499 with the hetero-receptor combination of ALK7-ActRIIB, which has a higher affinity for ActC than  
500 either receptor alone (Fig. 2). It has been suggested that exogenous ActC can directly  
501 antagonize ActA signaling<sup>8</sup>. One proposed mechanism is that ActC would be a competitive  
502 inhibitor towards the ActA receptors. Our data challenges this idea as ActC binds weakly to  
503 ActRIIA, ActRIIB, and the fusion ActRIIB-ALK4-Fc. Thus, the main mechanism of ActC  
504 antagonism of ActA is likely through heterodimer formation, where the ActAC ligand signals less  
505 potently through ALK4, while gaining the ability to signal through ALK7, when present.

506 Another unexpected characteristic of ActC is its interaction or lack thereof with the  
507 extracellular antagonists, the follistatins. Given ActC's structural similarity to other activin class  
508 members, it was unexpected that neither Fst288 nor FstI3 inhibited ActC. Similarly, suppression  
509 of ActAC signaling was less significant compared to the other activin ligands ActA and ActB  
510 (Fig. 4). This indicates that the  $\text{inh}\beta\text{C}$  chain limits follistatin binding and confers resistance to  
511 antagonism. The biological implications of follistatin resistance will need to be further explored,  
512 but it is tempting to speculate that the presence of follistatin would interfere with ligands that  
513 signal through ALK4, providing a permissive environment for the lower affinity ActC to bind type  
514 II receptors and signal via ALK7. Additionally, the presence of follistatin, while limiting ActA and  
515 ActB signaling, would still permit ActAC signaling via ALK4.

516 Having low affinity for the type II receptors and resistance to follistatin distinguishes ActC  
517 from the other members of the activin class and raises the question as to what confers  
518 differences in ligand properties, especially given their >50% sequence identity. Comparison  
519 across the activins revealed conservation of the shared type II/follistatin binding surface, except

520 for a single residue, centrally located in the interface. While most activins have an alanine at this  
521 position, Inh $\beta$ C contains a glutamine akin to the glutamate within the TGF- $\beta$ 's (TGF- $\beta$  1-3) (Fig.  
522 S4). Converting this residue to an alanine in ActC resulted in a ligand with higher affinity for  
523 ActRIIA and increased sensitivity to follistatin. While not the only molecular difference, it  
524 appears that Inh $\beta$ C has evolved a single substitution centrally located in a major binding epitope  
525 relative other activin class members that suppresses its interaction with follistatin and type II  
526 receptors. Comparison across different species shows this deviation is conserved in mammals  
527 (Fig. S5). Interestingly, fish are divergent and possess the alanine version of Inh $\beta$ C similar to  
528 Inh $\beta$ A and Inh $\beta$ B. This bifurcation in conservation suggests differentially evolved activin ligands  
529 exist in the two taxa and might provide clues as to the biological function of ActC in different  
530 species.

531 Physiological roles for ActC and ActAC have not yet been established. However, given  
532 the ability of the ligands to signal via ALK7, we turned our attention to adipocytes. Human  
533 adipose tissue is a major site of both ActB and ALK7 expression, where the pair induces pro-  
534 obesity signaling outcomes, such as catecholamine resistance or inhibition of lipolysis<sup>29,43,51</sup>. In  
535 this study, we show that ActC regulates adipocyte differentiation differently than ActA or ActB.  
536 While both ActA and ActB exhibit potent inhibitory effects in cultured adipocytes, ActC does not.  
537 This difference is explained, in part, by the ability of ActA and ActB, but not ActC, to signal via  
538 ALK4, which is present in pre-adipocytes and throughout their maturation and differentiation. In  
539 contrast, ActC can signal in adipose tissue only once ALK7 is expressed, which occurs in the  
540 later stages of adipocyte differentiation. In this context, ActC negatively regulates lipase  
541 expression, lipid content, and elicits a SMAD2 response similar to that of ActB. In addition to  
542 ActB and ActC, the TGF $\beta$  ligand, GDF3, can also signal through ALK7. GDF3 signaling is  
543 supported by the co-receptor Cripto and is implicated in the regulation of energy homeostasis  
544 and adipocyte function<sup>27</sup>. Thus, taken together, it appears that several TGF- $\beta$  ligands have  
545 evolved the ability to signal in adipocytes depending on the receptor/co-receptor profile.

546 Given that ActC expression and secretion is highest within the liver, a tissue with low  
547 ALK7 expression, it is possible that ActC acts as a hepatokine functioning systemically in fat  
548 regulation<sup>51,52</sup>. Unlike ActB, ActC is not antagonized by follistatin and may therefore serve as an  
549 uninhibited, basal signal in the face of variable follistatin expression, such as during  
550 thermogenesis in adipocytes following cold exposure<sup>53</sup>. Another possible role might be during  
551 liver regeneration, as ActAC and ActC have been observed in serum, coinciding with a surge of  
552 follistatin expression<sup>54</sup>.

553 Another member of the activin class, ActE, is expressed highest in the liver and has  
554 been implicated as a hepatokine with a role in energy homeostasis; however, whether ActE can  
555 signal and, if so, through which receptors, has yet to be determined<sup>55</sup>. Interestingly, ActE has a  
556 glutamine in position 267, similar to ActC, and a leucine in position 265, replacing the conserved  
557 isoleucine (Fig. S4). These amino acid differences likely reduce ActE's affinity for the type II  
558 receptors and follistatin similar to ActC. Given these similarities it is possible that there is  
559 functional overlap between ActC and ActE, possibly in the liver-adipose signaling axis.

560 Throughout the body, there are a variety of activins with differential receptor and  
561 antagonist binding, yielding a variety of potential signaling capacities (Fig. 7). Our results  
562 indicate that ActC can act as a canonical TGF $\beta$  ligand, transducing SMAD2/3 responses similar  
563 to ActA and ActB, while avoiding inhibition through the follistatin family of antagonists. This  
564 observation challenges current thinking that ActC acts solely as an activin antagonist. Different  
565 than ActB, which can signal through both ALK4 and ALK7, ActC is specific for ALK7 and shows  
566 a preference for the type II receptor ActRIIA. Future studies will need to address the different  
567 biological roles of ActC and ActAC signaling through ALK7, with an initial focus on adipose  
568 tissue.

569

570 **Author Contributions.**

571 Each author contributed to research design; E.J.G., L.O., and E.K., and E.B. performed  
572 research; R.C. and R.K. contributed reagents/analytic tools; E.J.G and T.B.T wrote the  
573 manuscript. D.J.B., L.O. R.C. and E.K., edited the manuscript.

574

575 **Conflicts of Interest.**

576 E.B., R.C., and R.K. are past employees of Acceleron Pharma and are now employees of Merck  
577 Sharp & Dohme Corp., a subsidiary of Merck & Co., Inc., Kenilworth, NJ, USA. The other  
578 authors report no competing interests.

579

580 **References.**

- 581 1. Thompson, T. B., Cook, R. W., Chapman, S. C., Jardetzky, T. S. & Woodruff, T. K. Beta  
582 A versus beta B: Is it merely a matter of expression? *Mol. Cell. Endocrinol.* **225**, 9–17  
583 (2004).
- 584 2. Nakamura, T. *et al.* Isolation and characterization of native activin B. *J. Biol. Chem.* **267**,  
585 16385–16389 (1992).
- 586 3. Mellor, S. L. *et al.* Localization of activin  $\beta$ A-,  $\beta$ B-, and  $\beta$ C-subunits in human prostate and  
587 evidence for formation of new activin heterodimers of  $\beta$ C-subunit. *J. Clin. Endocrinol.*  
588 *Metab.* **85**, 4851–4858 (2000).
- 589 4. Mellor, S. L., Ball, E. M. A., Connor, A. E. O., Ethier, O. I. S. & Risbridger, G. P. Activin  
590 BetaC -Subunit Heterodimers Provide a New Mechanism of Regulating Activin Levels in  
591 the Prostate. (2003). doi:10.1210/en.2003-0225
- 592 5. Butler, C. M., Gold, E. J. & Risbridger, G. P. Should activin  $\beta$ C be more than a fading  
593 snapshot in the activin/TGF $\beta$  family album? *Cytokine and Growth Factor Reviews* **16**,  
594 377–385 (2005).
- 595 6. Hotten, G., Neidhardt, H., Schneider, C. & Pohl, J. Cloning of a New Member of the TGF-  
596  $\beta$  Family: A Putative New Activin  $\beta$ C Chain. *Biochem. Biophys. Res. Commun.* **206**, 608–  
597 613 (1995).
- 598 7. Lau, A. L., Kumar, T. R., Nishimori, K., Bonadio, J. & Matzuk, M. M. Activin  $\beta$ C and  $\beta$ E  
599 Genes Are Not Essential for Mouse Liver Growth, Differentiation, and Regeneration. *Mol.*  
600 *Cell. Biol.* **20**, 6127–6137 (2000).
- 601 8. Gold, E. *et al.* Activin C antagonizes activin A in vitro and overexpression leads to  
602 pathologies in vivo. *Am. J. Pathol.* **174**, 184–195 (2009).
- 603 9. Olsen, O. E. *et al.* Activins as dual specificity TGF- $\beta$  family molecules: SMAD-activation  
604 via activin-and BMP-type 1 receptors. *Biomolecules* **10**, 1–15 (2020).
- 605 10. Namwanje, M. & Brown, C. W. Activins and Inhibins : Roles in Development , Physiology  
606 , and Disease. (2016).
- 607 11. Gold, E., Marino, F. E., Harrison, C., Makanji, Y. & Risbridger, G. Activin- $\beta$ c reduces  
608 reproductive tumour progression and abolishes cancer-associated cachexia in inhibin-  
609 deficient mice. *J. Pathol.* **229**, 599–607 (2013).
- 610 12. Bi, X. *et al.* Oncogenic activin C interacts with decorin in colorectal cancer in vivo and in  
611 vitro. *Mol. Carcinog.* **55**, 1786–1795 (2016).
- 612 13. Huang, Y. K. *et al.* Cytokine activin C ameliorates chronic neuropathic pain in peripheral  
613 nerve injury rodents by modulating the TRPV1 channel. *Br. J. Pharmacol.* **177**, 5642–  
614 5657 (2020).
- 615 14. Liu, X. J. *et al.* Activin C expressed in nociceptive afferent neurons is required for  
616 suppressing inflammatory pain. *Brain* **135**, 391–403 (2012).
- 617 15. Derynck, R. & Budi, E. H. Specificity, versatility, and control of TGF-b family signaling.  
618 *Sci. Signal.* **12**, (2019).
- 619 16. Goebel, E. J. *et al.* Structural characterization of an activin class ternary receptor complex  
620 reveals a third paradigm for receptor specificity. *Proc. Natl. Acad. Sci.* 201906253 (2019).

- 621 doi:10.1073/pnas.1906253116
- 622 17. Goebel, E. J., Hart, K. N., McCoy, J. C. & Thompson, T. B. Structural biology of the TGF $\beta$
- 623 family. *Experimental Biology and Medicine* **244**, 1530–1546 (2019).
- 624 18. Hinck, A. P., Mueller, T. D. & Springer, T. A. Structural Biology and Evolution of the TGF-
- 625 b Family. *Cold Spring Harb. Perspect. Biol.* 1–51 (2016).
- 626 doi:10.1101/cshperspect.a022103
- 627 19. Walker, R. G. *et al.* Structural basis for potency differences between GDF8 and GDF11.
- 628 *BMC Biol.* **15**, 19 (2017).
- 629 20. Goebel, E. J. *et al.* Structures of activin ligand traps using natural sets of type I and type II
- 630 TGF $\beta$  receptors. *iScience* 103590 (2021). doi:10.1016/j.isci.2021.103590
- 631 21. Sako, D. *et al.* Characterization of the ligand binding functionality of the extracellular
- 632 domain of activin receptor type IIB. *J. Biol. Chem.* **285**, 21037–21048 (2010).
- 633 22. Groppe, J. *et al.* Cooperative Assembly of TGF- $\beta$  Superfamily Signaling Complexes Is
- 634 Mediated by Two Disparate Mechanisms and Distinct Modes of Receptor Binding. *Mol.*
- 635 *Cell* **29**, 157–168 (2008).
- 636 23. Bondestam, J. *et al.* cDNA cloning, expression studies and chromosome mapping of
- 637 human type I serine/threonine kinase receptor ALK7 (ACVR1C). *Cytogenet. Cell Genet.*
- 638 **95**, 157–162 (2002).
- 639 24. Carlsson, L. M. S. *et al.* ALK7 expression is specific for adipose tissue, reduced in obesity
- 640 and correlates to factors implicated in metabolic disease. *Biochem. Biophys. Res.*
- 641 *Commun.* **382**, 309–314 (2009).
- 642 25. Michael, I. P. *et al.* ALK7 Signaling Manifests a Homeostatic Tissue Barrier That Is
- 643 Abrogated during Tumorigenesis and Metastasis. *Dev. Cell* 409–424 (2019).
- 644 doi:10.1016/j.devcel.2019.04.015
- 645 26. Li, X. & Ventura, A. ALK7 Erects a Suppressive Barrier to Tumor Progression and
- 646 Metastasis. *Dev. Cell* **49**, 304–305 (2019).
- 647 27. Andersson, O., Korach-Andre, M., Reissmann, E., Ibanez, C. F. & Bertolino, P.
- 648 Growth/differentiation factor 3 signals through ALK7 and regulates accumulation of
- 649 adipose tissue and diet-induced obesity. *Proc. Natl. Acad. Sci.* **105**, 7252–7256 (2008).
- 650 28. Yogosawa, S., Mizutani, S., Ogawa, Y. & Izumi, T. Activin Receptor-Like Kinase 7
- 651 Suppresses Lipolysis to Accumulate Fat in Obesity Through Downregulation of
- 652 Peroxisome Proliferator – Activated Receptor  $\alpha$  and C/EBP  $\alpha$ . **62**, 115–123 (2013).
- 653 29. Guo, T. *et al.* Adipocyte ALK7 links nutrient overload to catecholamine resistance in
- 654 obesity. *Elife* **3**, e03245 (2014).
- 655 30. Bu, Y. *et al.* Insulin regulates lipolysis and fat mass by upregulating growth/differentiation
- 656 factor 3 in adipose tissue macrophages. *Diabetes* **67**, 1761–1772 (2018).
- 657 31. Pearsall, R. S. *et al.* A soluble activin type IIA receptor induces bone formation and
- 658 improves skeletal integrity. *Proc. Natl. Acad. Sci. U. S. A.* **105**, 7082–7087 (2008).
- 659 32. Paul Oh, S. *et al.* Activin type IIA and IIB receptors mediate Gdf11 signaling in axial
- 660 vertebral patterning. *Genes Dev.* **16**, 2749–2754 (2002).
- 661 33. Harrison, C. A., Chan, K. L. & Robertson, D. M. Activin-A binds follistatin and type II
- 662 receptors through overlapping binding sites: Generation of mutants with isolated binding
- 663 activities. *Endocrinology* **147**, 2744–2753 (2006).
- 664 34. Li, J. *et al.* ActRIIB:ALK4-Fc alleviates muscle dysfunction and comorbidities in murine
- 665 models of neuromuscular disorders. *J. Clin. Invest.* **131**, (2021).
- 666 35. Cash, J. N., Rejon, C. A., McPherron, A. C., Bernard, D. J. & Thompson, T. B. The
- 667 structure of myostatin:follistatin 288: insights into receptor utilization and heparin binding.
- 668 *EMBO J.* **28**, 2662–76 (2009).
- 669 36. Cash, J. N. *et al.* Structure of myostatin-follistatin-like 3: N-terminal domains of follistatin-
- 670 type molecules exhibit alternate modes of binding. *J. Biol. Chem.* **287**, 1043–53 (2012).
- 671 37. Cash, J. N., Angerman, E. B., Keutmann, H. T. & Thompson, T. B. Characterization of

- 672 follistatin-type domains and their contribution to myostatin and activin A antagonism. *Mol.*  
673 *Endocrinol.* **26**, 1167–78 (2012).
- 674 38. Thompson, T. B., Lerch, T. F., Cook, R. W., Woodruff, T. K. & Jardetzky, T. S. The  
675 structure of the follistatin:activin complex reveals antagonism of both type I and type II  
676 receptor binding. *Dev. Cell* **9**, 535–543 (2005).
- 677 39. Stamlar, R. *et al.* The structure of FSTL3-activin A complex: Differential binding of N-  
678 terminal domains influences follistatin-type antagonist specificity. *J. Biol. Chem.* **283**,  
679 32831–32838 (2008).
- 680 40. Sidis, Y. *et al.* Biological activity of follistatin isoforms and follistatin-like-3 is dependent on  
681 differential cell surface binding and specificity for activin, myostatin, and bone  
682 morphogenetic proteins. *Endocrinology* **147**, 3586–3597 (2006).
- 683 41. Bernard, D. J., Chapman, S. C. & Woodruff, T. K. Mechanisms of inhibin signal  
684 transduction. *Recent Prog. Horm. Res.* **56**, 417–450 (2001).
- 685 42. Thompson, T. B., Woodruff, T. K. & Jardetzky, T. S. Structures of an ActRIIB:activin A  
686 complex reveal a novel binding mode for TGF-beta ligand:receptor interactions. *EMBO J.*  
687 **22**, 1555–66 (2003).
- 688 43. Ibáñez, C. F. Regulation of metabolic homeostasis by the TGF- $\beta$  superfamily receptor  
689 ALK7. *FEBS J.* 1–22 (2021). doi:10.1111/febs.16090
- 690 44. Kogame, M. *et al.* ALK7 is a novel marker for adipocyte differentiation. *J. Med. Investig.*  
691 **53**, 238–245 (2006).
- 692 45. Hoggard, N. *et al.* Inhibin  $\beta$ B expression in murine adipose tissue and its regulation by  
693 leptin, insulin and dexamethasone. *J. Mol. Endocrinol.* **43**, 171–177 (2009).
- 694 46. Hirai, S., Yamanaka, M., Kawachi, H., Matsui, T. & Yano, H. Activin A inhibits  
695 differentiation of 3T3-L1 preadipocyte. *Mol. Cell. Endocrinol.* **232**, 21–26 (2005).
- 696 47. Nielsen, P. Coastal and estuarine processes. *Coastal And Estuarine Processes* 1–360  
697 (2009). doi:10.1142/7114
- 698 48. Kaito, T. *et al.* BMP-2/7 heterodimer strongly induces bone regeneration in the absence  
699 of increased soft tissue inflammation. *Spine J.* **18**, 139–146 (2018).
- 700 49. Aono, A. *et al.* Potent ectopic bone-inducing activity of bone morphogenetic protein- 4-7  
701 heterodimer. *Biochemical and Biophysical Research Communications* **210**, 670–677  
702 (1995).
- 703 50. Aykul, S. *et al.* Activin a forms a non-signaling complex with acvr1 and type ii activin/bmp  
704 receptors via its finger 2 tip loop. *Elife* **9**, 1–19 (2020).
- 705 51. Jacobson, P., Walley, A. J., George, S., Froguel, P. & Svensson, P. ALK7 expression is  
706 specific for adipose tissue, reduced in obesity and correlates to factors implicated in  
707 metabolic disease Article. (2009). doi:10.1016/j.bbrc.2009.03.014
- 708 52. Schmitt, J. *et al.* Structure, chromosomal localization, and expression analysis of the  
709 mouse inhibin/activin  $\beta$ c (Inhbc) gene. *Genomics* **32**, 358–366 (1996).
- 710 53. Braga, M. *et al.* Follistatin promotes adipocyte differentiation, browning, and energy  
711 metabolism. *J. Lipid Res.* **55**, 375–384 (2014).
- 712 54. Gold, E. J. *et al.*  $\beta$ A- and  $\beta$ C-activin, follistatin, activin receptor mRNA and  $\beta$ C-activin  
713 peptide expression during rat liver regeneration. *J. Mol. Endocrinol.* **34**, 505–515 (2005).
- 714 55. Sugiyama, M. *et al.* Inhibin  $\beta$ E (INHBE) is a possible insulin resistance-associated  
715 hepatokine identified by comprehensive gene expression analysis in human liver biopsy  
716 samples. *PLoS One* **13**, 1–20 (2018).
- 717 56. Cadena, S. M. *et al.* Administration of a soluble activin type IIB receptor promotes  
718 skeletal muscle growth independent of fiber type. *J. Appl. Physiol.* **109**, 635–642 (2010).
- 719 57. Kumar, R. *et al.* Functionally diverse heteromeric traps for ligands of the transforming  
720 growth factor- $\beta$  superfamily. *Sci. Rep.* **11**, 1–16 (2021).
- 721 58. Pangas, S. A. & Woodruff, T. K. Production and purification of recombinant human inhibin  
722 and activin. *J. Endocrinol.* **172**, 199–210 (2012).

- 723 59. Nolan, K. *et al.* Structure of Protein Related to DAN and Cerberus (PRDC): Insights into  
 724 the Mechanism of BMP Antagonism. *Structure* **21**, 7428–7429 (2013).  
 725 60. Waterhouse, A. *et al.* SWISS-MODEL: Homology modelling of protein structures and  
 726 complexes. *Nucleic Acids Res.* **46**, W296–W303 (2018).  
 727 61. Greenwald, J. *et al.* A flexible activin explains the membrane-dependent cooperative  
 728 assembly of TGF- $\beta$  family receptors. *Mol. Cell* **15**, 485–489 (2004).  
 729 62. Wang, X., Fischer, G. & Hyvönen, M. Structure and activation of pro-activin A. *Nat.*  
 730 *Commun.* **7**, 12052 (2016).  
 731 63. Harrington, A. E. *et al.* Structural basis for the inhibition of activin signalling by follistatin.  
 732 *EMBO J.* **25**, 1035–1045 (2006).  
 733 64. Bowles, A. C., Scruggs, B. A. & Bunnell, B. A. Mesenchymal stem cell-based therapy in a  
 734 mouse model of experimental autoimmune encephalomyelitis (EAE). *Methods Mol. Biol.*  
 735 **1213**, 303–319 (2014).  
 736 65. Livak, K. J. & Schmittgen, T. D. Analysis of relative gene expression data using real-time  
 737 quantitative PCR and the 2- $\Delta\Delta$ CT method. *Methods* **25**, 402–408 (2001).  
 738  
 739  
 740  
 741

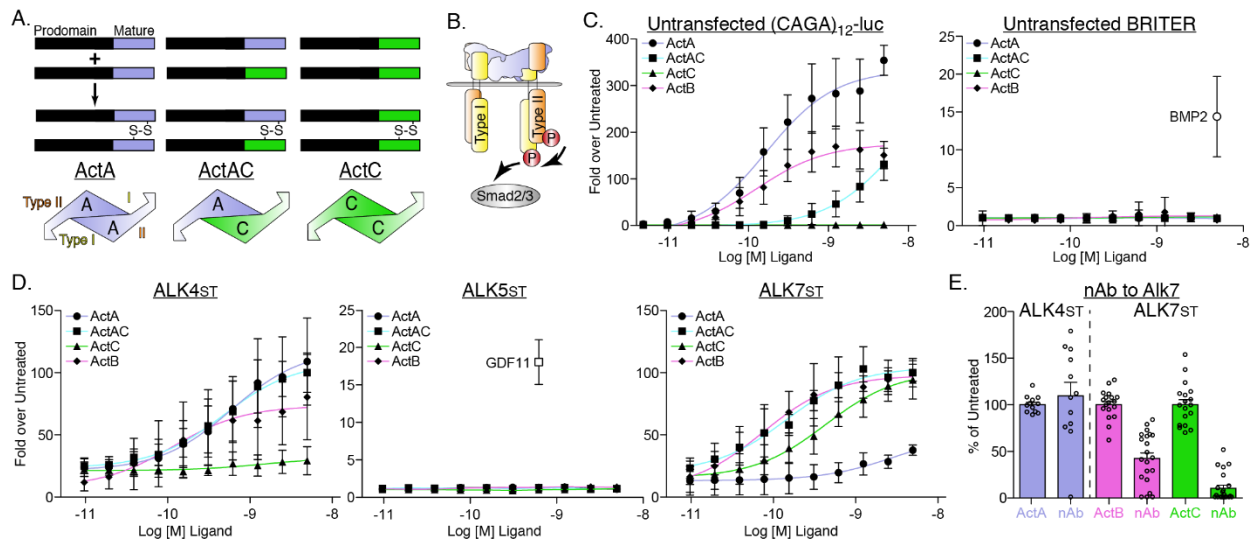

742  
 743  
 744 **Figure 1. Differences in type I receptor utilization by ActA, ActAC, and ActC.** (A)  
 745 Schematic displaying formation of activin A (ActA), AC (ActAC), and C (ActC) from dimerization  
 746 of inhibin beta A (*blue*) and beta C subunits (*green*). (B) Generalized TGF $\beta$  signaling schematic  
 747 displaying activin-SMAD2/3 signaling with type II (*orange*) and type I (*yellow*) receptor binding  
 748 positions displayed for ActA. (C) Luciferase reporter assay in response to ActA, ActAC, or ActC  
 749 titration in untransfected (CAGA)<sub>12</sub>-luc or BRITER HEKT cells. BMP2 was included as a positive  
 750 control for the BRITER reporter. (D) ActA, ActAC, ActC, and ActB activation of (CAGA)<sub>12</sub>-luc  
 751 HEK293T cells transfected with SB-431542-resistant (Ser to Thr, ST) type I receptors. In C and  
 752 D, each data point represents the mean  $\pm$  SD of triplicate experiments measuring relative  
 753 luminescence units (RLU). ALK4<sub>st</sub> and ALK7<sub>st</sub> transfection assays in D were normalized to 100  
 754 fold from mean of highest point. (E) Effects of an ALK7 neutralizing antibody (nAb) on ActA,  
 755 ActB, and ActC induction of (CAGA)<sub>12</sub>-luc activity in cells expressing the indicated type I  
 756 receptors. In E, each data point represents a technical replicate within triplicate experiments



757 with bars displaying the mean  $\pm$  SD. In both (D) and (E), cells were treated with 10uM SB-  
758 431542 to inhibit signaling activity of endogenous receptors.

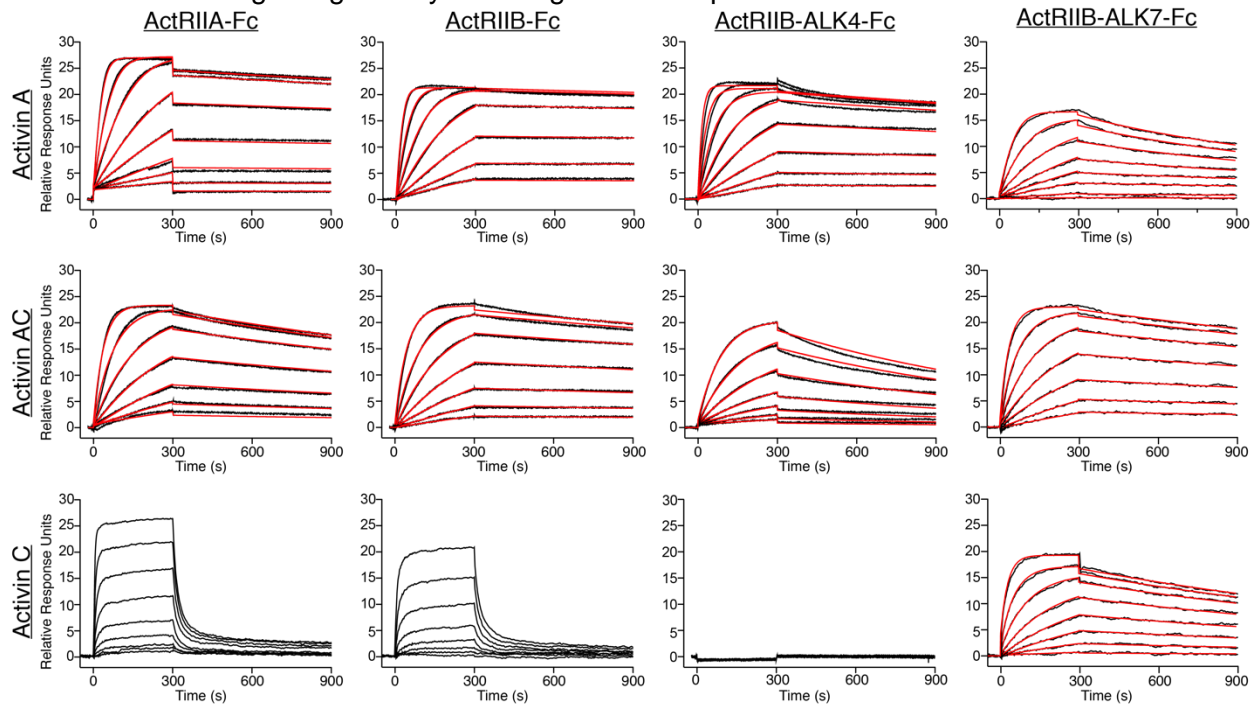

759 **Figure 2. ActC binds activin type II receptors with low affinity.** Representative SPR  
760 sensorgrams of ActA, ActAC, and ActC binding to protein-A captured ActRIIA-Fc, ActRIIB-Fc,  
761 ActRIIB-ALK7-Fc or ActRIIB-ALK4-Fc. Sensorgrams (*black lines*) are overlaid with fits to a 1:1  
762 binding model with mass transport limitations (*red lines*). ActC binding to ActRIIA and ActRIIB  
763 were fit using a steady state model. Each experiment was performed in duplicate with the kinetic  
764 parameters summarized in SI appendix Table S1.  
765  
766

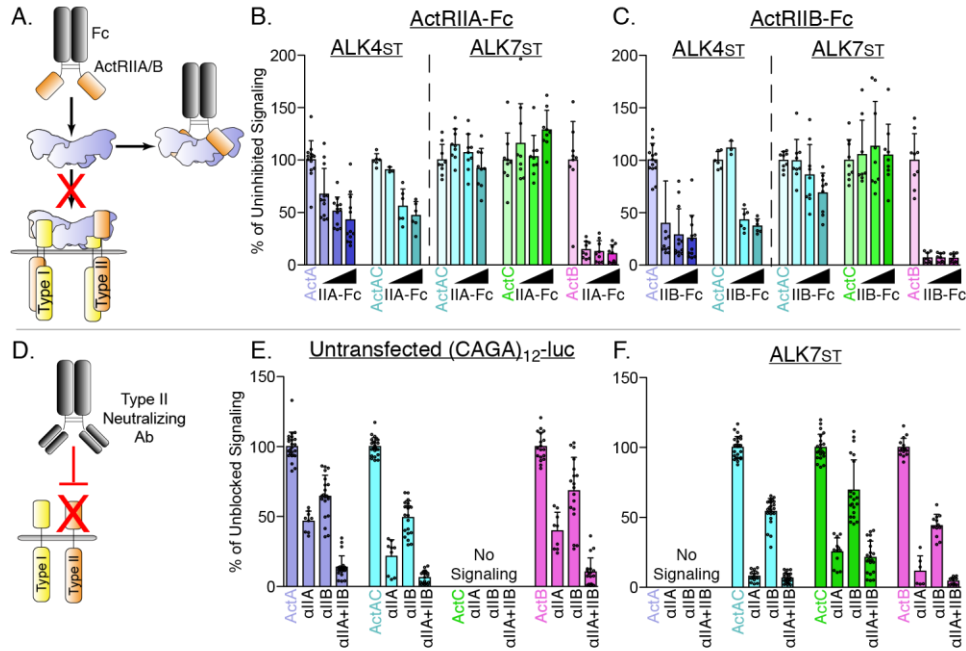

767  
768

769 **Figure 3. ActA and ActAC signal via activin type II receptors.** (A) Schematic representation  
770 of activin type II receptor Fc-fusion proteins as decoys. (B and C) HEK293T (CAGA)<sub>12</sub>-luc cells  
771 were transfected with ALK4<sub>st</sub> and ALK7<sub>st</sub> and treated with SB-431542 and ActA, ActAC, ActC, or  
772 ActB (0.62nM) as in Fig. 1 in the presence of increasing quantities of either ActRIIA-Fc (B) or  
773 ActRIIB-Fc (C). (D) Schematic representation of neutralizing antibodies targeting the type II  
774 receptor ECDs. (E and F) HEK293T (CAGA)<sub>12</sub>-luc cells following treatment with ActA, ActAC,  
775 ActC, or ActB (0.62 nM) in the presence or absence of neutralizing antibodies targeting ActRIIA,  
776 ActRIIB, or both. No signaling was observed by ActC in E or ActA in F. Each data point  
777 represents technical replicates within triplicate experiments measuring relative luminescence  
778 units (RLU) with bars displaying the mean ± SD. Data are represented as % of uninhibited (B  
779 and C) or unblocked (E and F) signal.

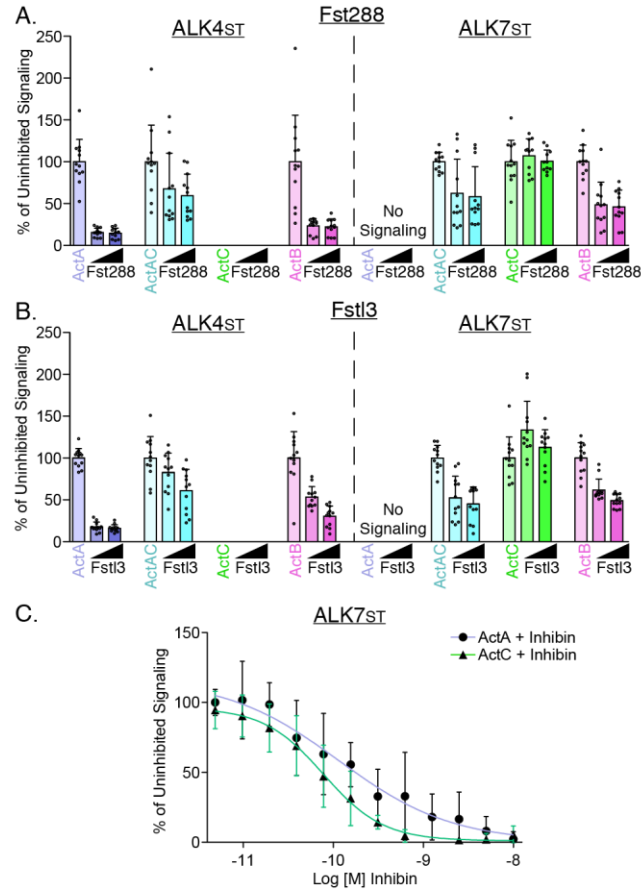

780  
781  
782  
783  
784  
785  
786  
787  
788  
789  
790

**Figure 4. Actin C is resistant to inhibition by follistatin, but not inhibin A.** (A) HEK293T (CAGA)<sub>12</sub>-luc cells were transfected with ALK4<sub>st</sub> and ALK7<sub>st</sub> and treated with SB-431542 and ActA, ActAC, ActC, or ActB (0.62nM) with increasing quantities (12.5 nM or 25 nM) of either Fst288 (A) or Fstl3 (B). (C) Luciferase assay following treatment with either ActA (ALK4<sub>st</sub> signaling) or ActC (ALK7<sub>st</sub> signaling) at a constant concentration (0.62 nM) along with titration of InhA. Each data point represents technical replicates within triplicate experiments measuring relative luminescence units (RLU) with bars displaying the mean ± SD. Data are represented as % of uninhibited.

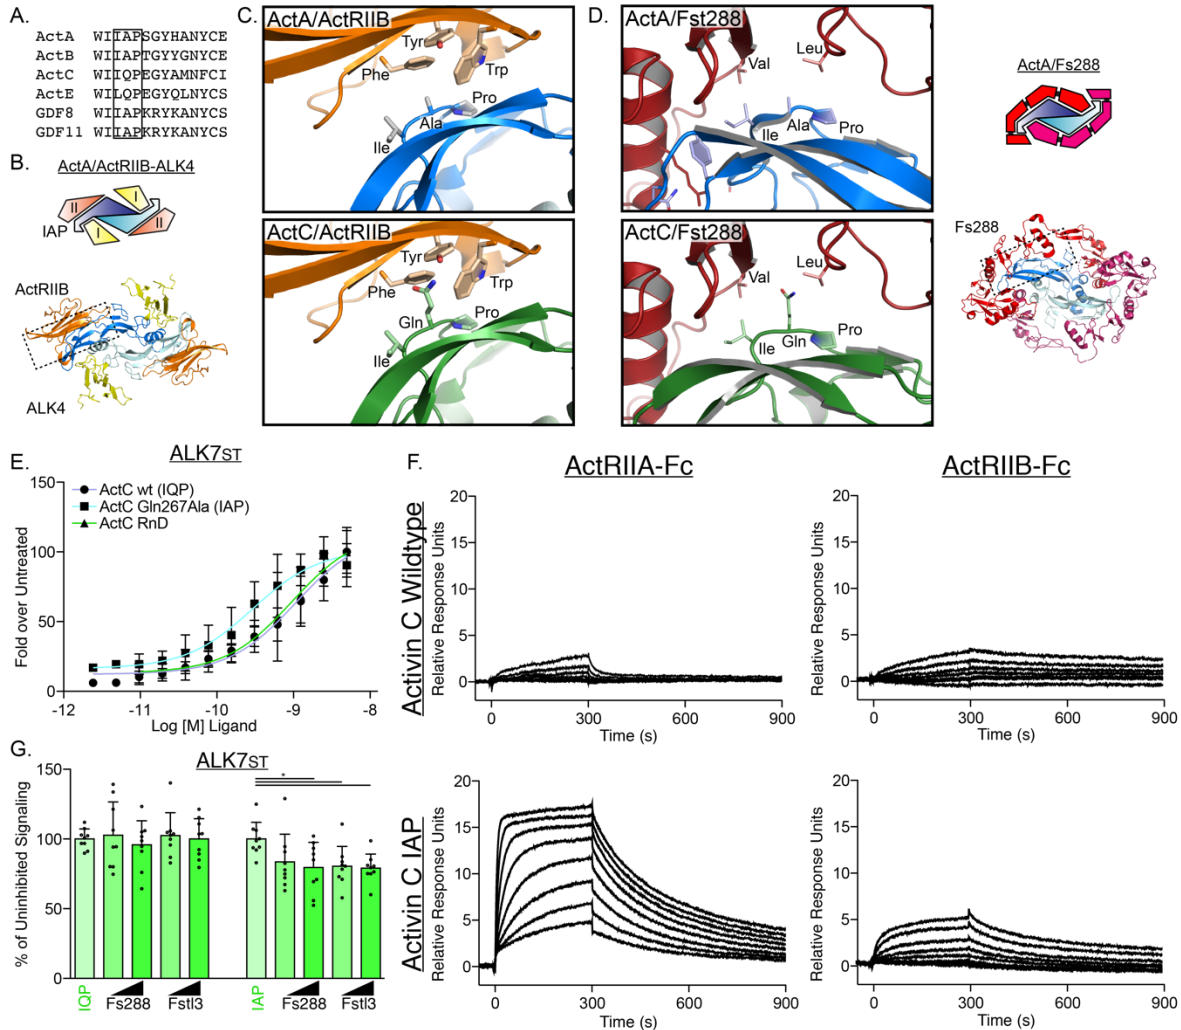

791  
792  
793  
794  
795  
796  
797  
798  
799  
800  
801  
802  
803  
804  
805  
806  
807  
808  
809  
810  
811  
812

**Figure 5. The Type II Interface of ActC is distinct from other activins.** (A) Sequence alignment across the activin class displays critical differences at the canonical type II receptor binding site. IAP motif is boxed in *black*. (B) Structure and schematic representation of the ActA/ActRIIB/ALK4 complex (PDB: 7OLY). ALK4 is in *yellow*, ActRIIB is in *orange*, ActA is in *blue*. (C) Comparison of type II receptor interface between ActA/ActRIIB and the ActC/ActRIIB model, centered on the IAP (ActA) and IQP (ActC) motifs. The ActC model was built from (PDB: 7OLY)<sup>38</sup>. (D) Comparison (*left*) of the Fst288 interface between ActA/Fst288 (PDB: 2BOU) and the ActC/Fst288 model, centered on the IAP (ActA) and IQP (ActC) motifs. Schematic of ActA/Fst288 included (*right*) for clarification. (E) ALK7<sub>st</sub>-dependent luciferase assay following treatment with ActC purchased from RnD Systems, or recombinant ActC wildtype (IQP) or ActC Gln267Ala (IAP) transiently produced in HEK293T cells. Each data point represents the mean ± SD of triplicate experiments measuring relative luminescence units (RLU). (F) Averaged SPR sensorgrams of ActC wt (IQP) and ActC Gln267Ala (IAP) binding to protein-A captured ActRIIA-Fc or ActRIIB-Fc. Sensorgrams (*black lines*) are overlaid with fits to a 1:1 binding model with mass transport limitations (*red lines*). Each experiment was performed in duplicate. (G) ALK7<sub>st</sub>-dependent luciferase reporter assay following treatment of ActC wt (IQP) and ActC Gln267Ala (IAP) (0.62 nM) with increasing concentrations (12.5 nM or 25 nM) of either Fst288 or FstI3. Each data point represents technical replicates within triplicate experiments measuring relative luminescence units (RLU) with bars displaying the mean ± SD.

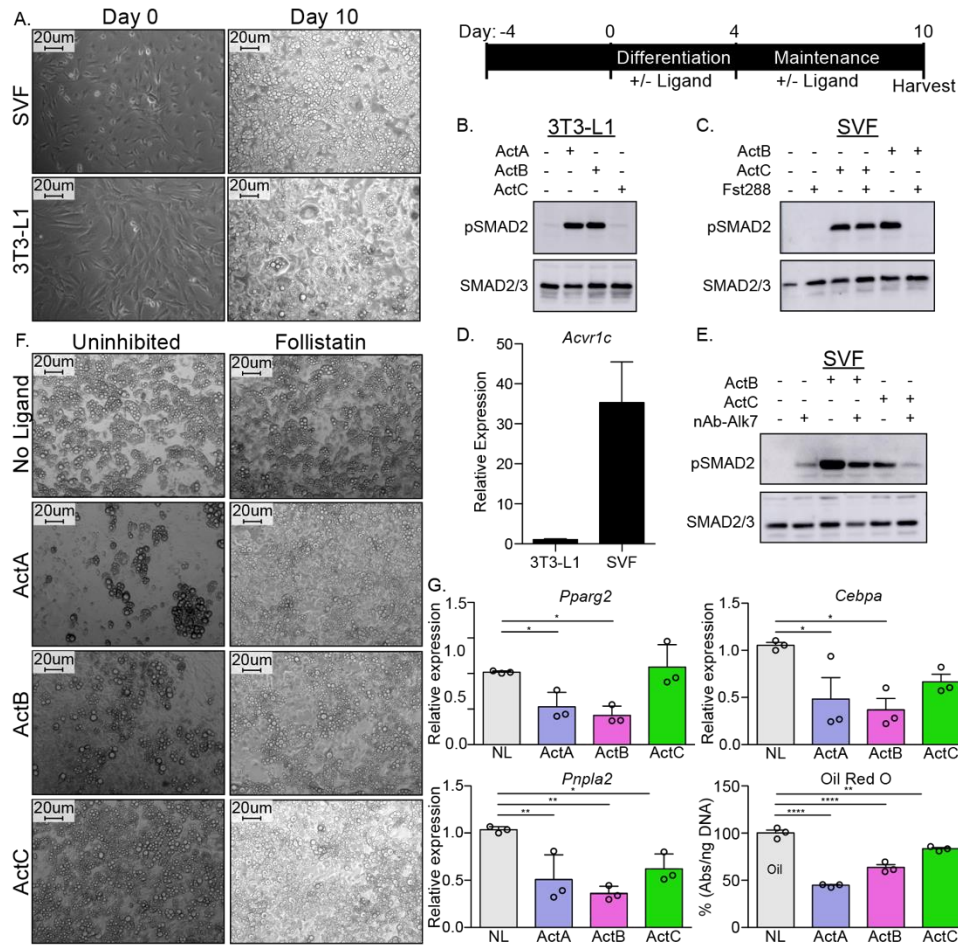

813  
814  
815  
816  
817  
818  
819  
820  
821  
822  
823  
824  
825  
826  
827  
828  
829  
830  
831  
832

**Figure 6. ActC activates SMAD2 through ALK7 in differentiated adipocytes.** (A) Representative images of isolated adipose-derived stromal vascular fraction (SVF) or cultured 3T3-L1 cells prior to differentiation (*left*, Day 0) and following differentiation (*right*, Day 10). Scale bars are 20  $\mu$ m. Schematic shown in *upper right* for visualization of timeline. (B) Western blot (WB) showing phosphorylated SMAD2 (pSMAD2) and total SMAD2/3 in 3T3-L1-derived adipocytes following treatment with ActA, ActB, or ActC (2 nM) for 1h. (C) WB following treatment of SVF-derived adipocytes with ActB or ActC (2 nM) with or without Fst288 (800 ng/ml) for 1h. (D) Quantitative PCR (RT-qPCR) of *Acvr1c* expression in differentiated 3T3-L1 cells and SVF adipocytes. Bars display mean  $\pm$  SD of three experimental replicates. (E) WB following treatment of SVF-derived adipocytes with ActB or ActC (2 nM) in the presence or absence of a neutralizing antibody targeting ALK7 for 1h. (F) Representative images of SVF-derived adipocytes following treatment with ActA, ActB, or ActC during differentiation with or without Fst288. (G) RT-qPCR of target genes *Pparg2*, *Cebpa*, and *Pnpla2* following treatment with ActA, ActB, or ActC during differentiation. Oil Red O quantification based on images in (F). Significance is represented as: \*  $p < 0.05$ , \*\* is  $p < 0.01$ , \*\*\*  $p < 0.001$  and \*\*\*\*  $p < 0.0001$ . Each experiment was performed in triplicate. While representative westerns are shown, supplemental westerns can be found in SI appendix Fig. S3.

833

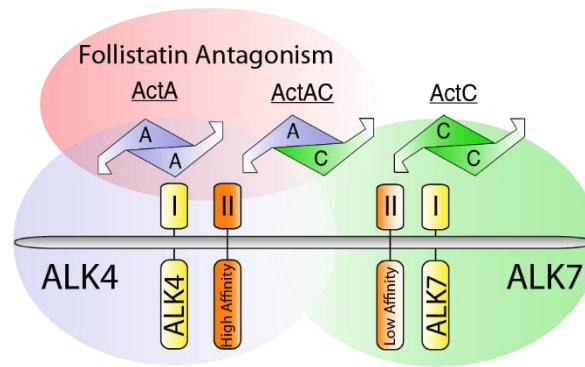

834

835

836

837

838

839

840

841

842

**Figure 7. Differences between ActA and ActC in type I receptor specificity, type II receptor affinity, and follistatin antagonism.** Gradients of follistatin antagonism (*red*), ALK4-dependent signaling (*blue*), ALK7-dependent signaling (*green*), and activin type II receptor affinity (*orange*) for ActA, ActAC, and ActC. Ligands and type I receptors are shown schematically.

843  
844

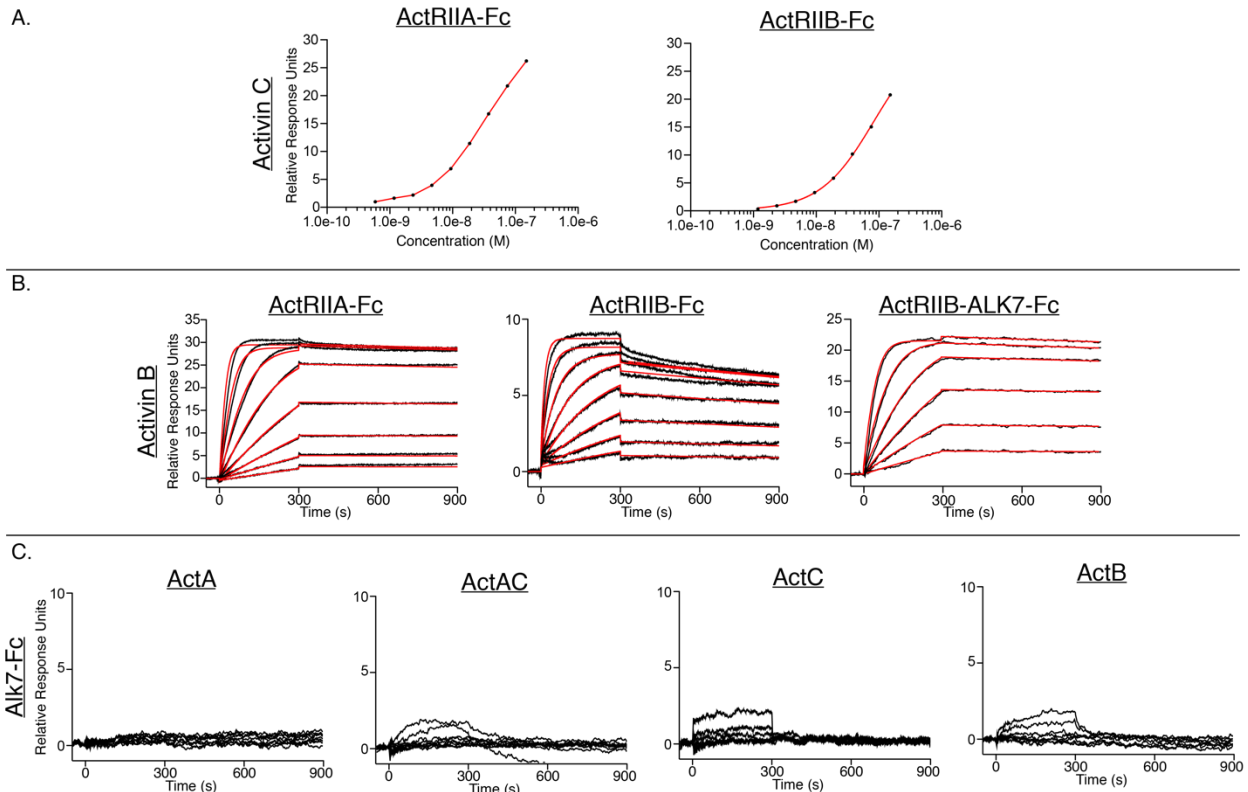

845  
846 **Supplemental Figure 1. Additional surface plasmon resonance sensorgrams of ActA,**  
847 **ActAC and ActC binding to Alk7 and ActB binding to different receptors.** (A) Steady state  
848 analysis of the following experiments in Fig. 2: ActC binding to captured ActRIIA-Fc and  
849 ActRIIB-Fc. (B) Representative SPR sensorgrams of ActB binding to protein-A captured  
850 ActRIIA-Fc, ActRIIB-Fc, or ActRIIB-ALK7-Fc. Sensorgrams (*black lines*) are overlaid with fits to  
851 a 1:1 binding model with mass transport limitations (*red lines*). (C) Representative SPR  
852 sensorgrams of ActA, ActAC ActC and ActB with Alk7-Fc captured on a protein A chip. Each  
853 experiment was performed in duplicate with the kinetic parameters, if available, summarized in  
854 SI appendix Table S1.  
855

856

Table S1 - Surface Plasmon Resonance

| Analyte    | Ligand          | $k_a$ ( $M^{-1}s^{-1}$ ) $\times 10^6$ | $k_d$ ( $s^{-1}$ ) $\times 10^{-4}$ | $K_D$ ( $\mu M$ ) <sup>a</sup> |
|------------|-----------------|----------------------------------------|-------------------------------------|--------------------------------|
| Activin A  | ActRIIA-Fc      | 7.2 $\pm$ 1.4                          | 1.6 $\pm$ 0.33                      | 22 $\pm$ 0.030                 |
| Activin A  | ActRIIB-Fc      | 7.7 $\pm$ 1.0                          | .60 $\pm$ .055                      | 8.1 $\pm$ 1.8                  |
| Activin A  | ActRIIB-ALK4-Fc | 7.0 $\pm$ 0.77                         | 2.1 $\pm$ 0.20                      | 30 $\pm$ 6.2                   |
| Activin A  | ActRIIB-ALK7-Fc | 2.9 $\pm$ 0.15                         | 8.9 $\pm$ 0.09                      | 310 $\pm$ 12                   |
| Activin AC | ActRIIA-Fc      | 2.9 $\pm$ 0.040                        | 4.3 $\pm$ 0.39                      | 150 $\pm$ 12                   |
| Activin AC | ActRIIB-Fc      | 2.4 $\pm$ 0.16                         | 2.1 $\pm$ 0.080                     | 90 $\pm$ 2.6                   |
| Activin AC | ActRIIB-ALK4-Fc | 2.1 $\pm$ 0.34                         | 9.2 $\pm$ 0.26                      | 460 $\pm$ 88                   |
| Activin AC | ActRIIB-ALK7-Fc | 5.6 $\pm$ 0.23                         | 2.8 $\pm$ 0.12                      | 51 $\pm$ 0.050                 |
| Activin C  | ActRIIA-Fc      | Transient Binding                      | Transient Binding                   | -                              |
| Activin C  | ActRIIB-Fc      | Transient Binding                      | Transient Binding                   | -                              |
| Activin C  | ActRIIB-ALK7-Fc | .25 $\pm$ .0075                        | 5.7 $\pm$ 0.060                     | 2200 $\pm$ 44                  |
| Activin B  | ActRIIA-Fc      | 7.7 $\pm$ 0.15                         | .73 $\pm$ 0.0020                    | 9.5 $\pm$ 0.21                 |
| Activin B  | ActRIIB-Fc      | 7.2 $\pm$ 0.22                         | 2.1 $\pm$ 0.36                      | 30. $\pm$ 5.9                  |
| Activin B  | ActRIIB-ALK7-Fc | 14 $\pm$ 0.0                           | .58 $\pm$ 0.10                      | 4.0 $\pm$ 0.70                 |

<sup>a</sup>All kinetic parameters were analyzed using the Biacore T200 evaluation software using a 1:1 binding model and are the average of two independent, replicate experiments.

857

858

**Supplemental Table 1. SPR Kinetic Analysis.**

859

860

861



862  
863  
864

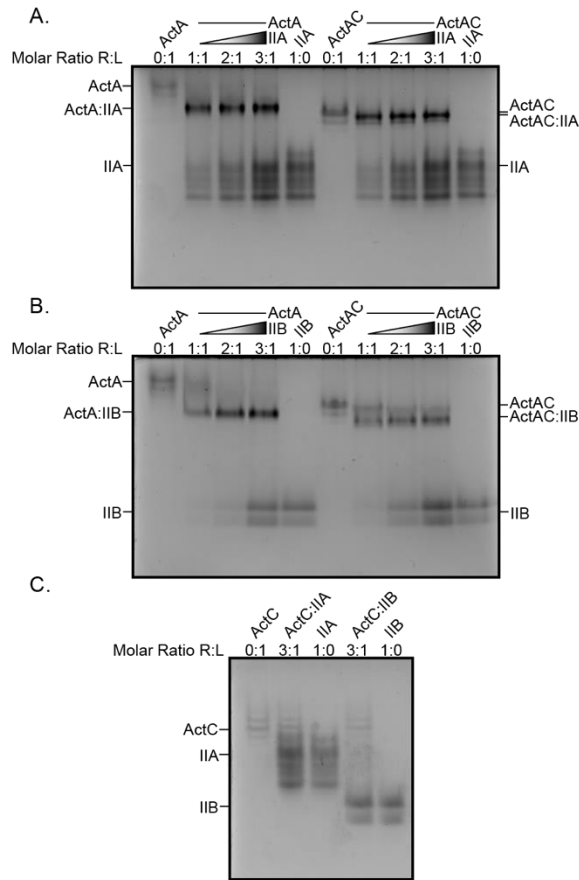

865  
866  
867  
868  
869  
870  
871  
872  
873  
874  
875

**Supplemental Figure 2. Native gel analysis of type II receptors and ActA, ActAC, and ActC.** Native PAGE analysis of ActRIIA (A) and ActRIIB (B) with ActA and ActAC. Binary complexes were formed by titrating receptor from 1:1 to 3:1 molar ratio against constant ligand. (C) Native PAGE analysis of 1:3 receptor:ligand molar ratio with ActC.

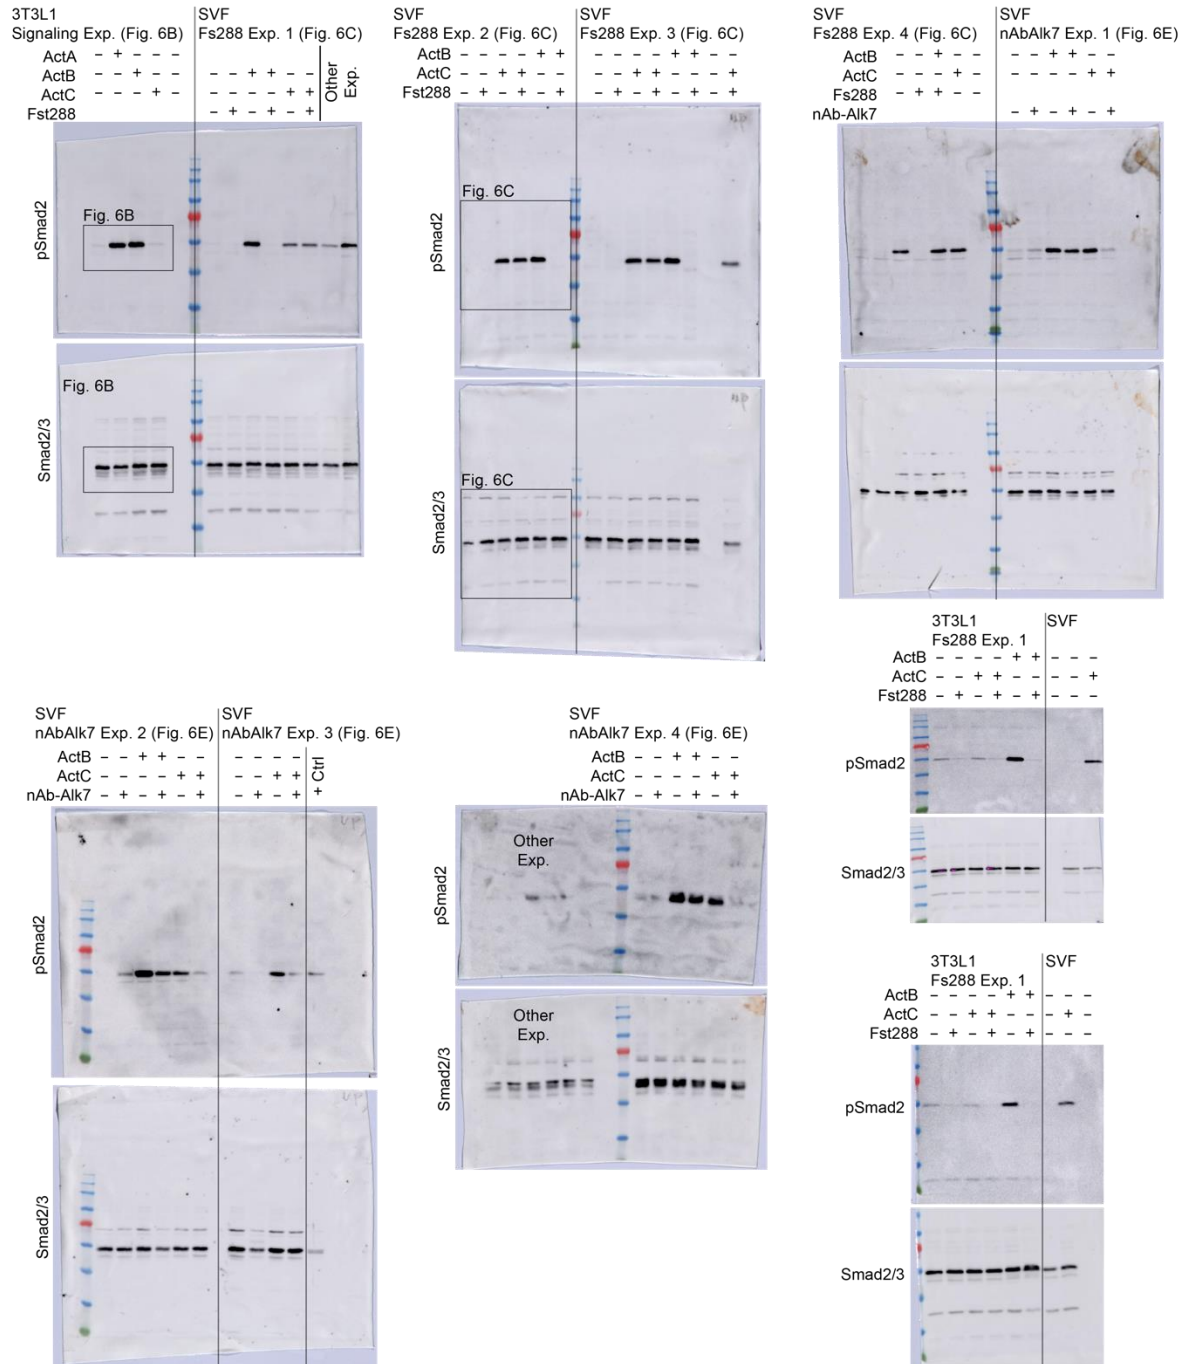

876  
877

878 **Supplemental Figure 3. Supplemental Adipocyte-pSMAD2/SMAD2/3 western blots.**

879 Supplemental westerns for representative blots shown in Fig. 6. Boxes are drawn to display  
880 which data were used for figure generation. Antibodies used: pSMAD2 (Cell Signaling, 138D4)  
881 and SMAD2/3 (Millipore, 07-408).

882  
883  
884

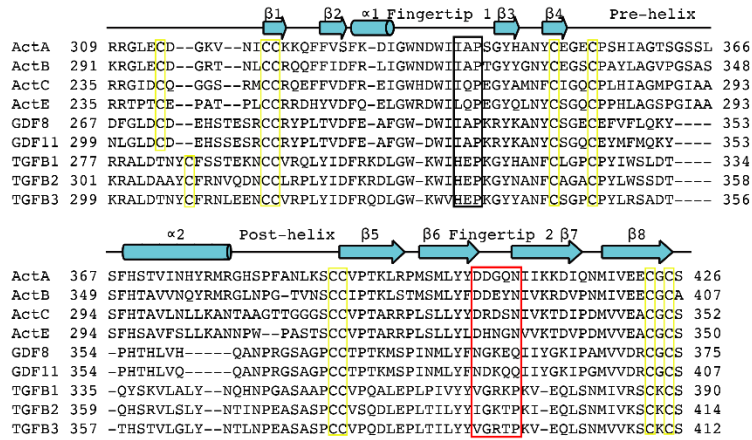

885

886 **Supplemental Figure 4. Sequence alignment of Activin and TGFβ ligands.** Sequence  
887 comparison of the mature ligand for human Activin subclass (ActA, ActB, ActC, ActE, GDF8 and  
888 GDF11), TGFβ1, TGFβ2, and TGFβ3. Numbering includes the signal sequence and prodomain  
889 (not shown). Fingertip residues are boxed in red. The conserved IAP motif is highlighted with a  
890 black box. Secondary structure elements are represented as arrows or cylinders for β-strands  
891 and α-helices, respectively. Disulfide bonds are boxed in yellow.

892

893

894  
895  
896

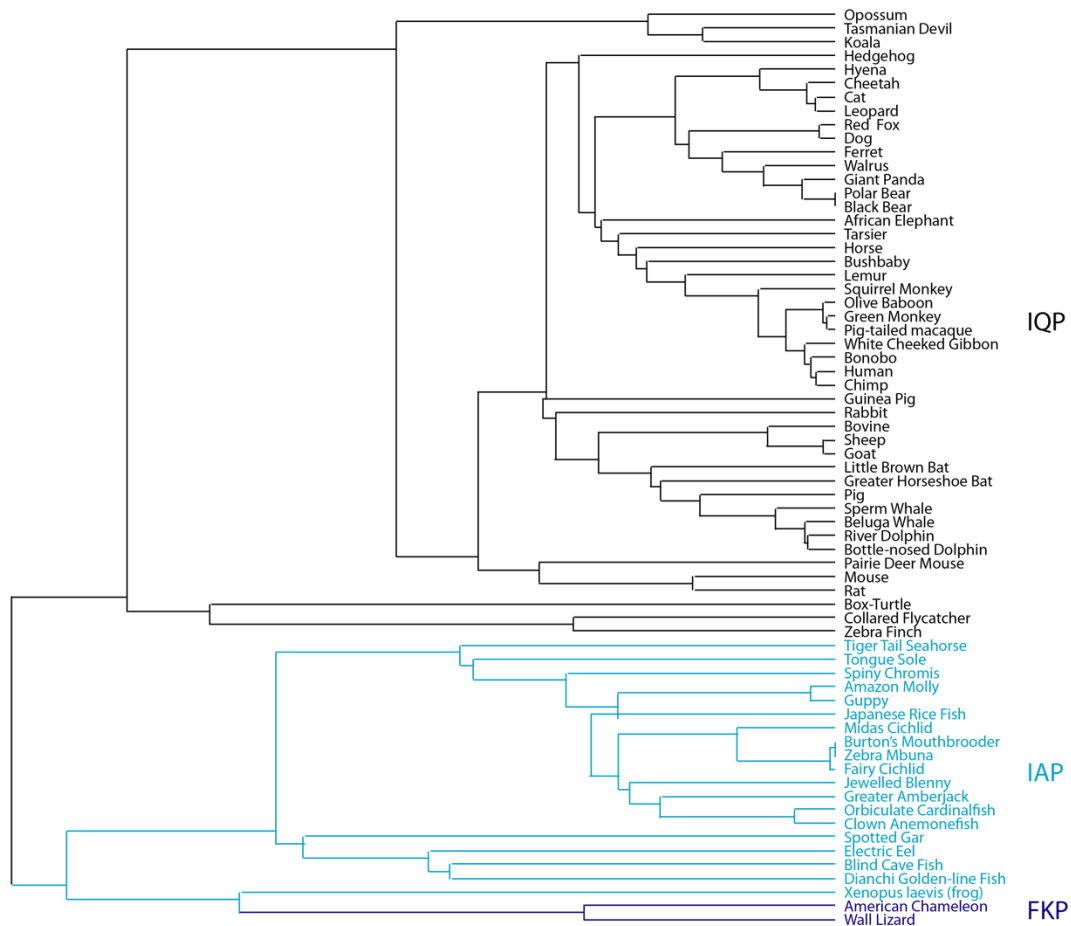

897  
898  
899  
900  
901  
902  
903  
904

**Supplemental Figure 5. The Phylogenetic History of ActC.** Phylogenetic analysis of full-length ActC across a large variety of species with focus on the type II receptor interface variance. Species with the IQP variant shown in *black*, with the IAP variant in *blue*, and with the FKP variant in *purple*.

| Gene   | Forward Primer Sequence    | Reverse Primer Sequence    |
|--------|----------------------------|----------------------------|
| Rpl19  | 5'-CGGAATCCAAGAAGATTGA-3'  | 5'-TTCAGCTTGTGGATGTGCTC-3' |
| Ppary2 | 5'-TTCGCTGATGCACTGCCTAT-3' | 5'-GGAATGCGAGTGGTCTTCCA-3' |
| Pnpl2  | 5'-CTCACATCTACGGAGCCTCG-3' | 5'-CGGATGGTCTTACCAGGTT-3'  |
| C/EBPd | 5'-TTCGGGTCGCTGGATCTCTA-3' | 5'-TCAAGGAGAAACCACCACGG-3' |

905  
906  
907  
908  
909  
910  
911  
912  
913  
914

**Supplemental Table 2. qPCR primer sequences.**
